1 **Metagenomic profiling of ammonia- and methane-oxidizing microorganisms in a Dutch**  
2 **drinking water treatment plant**

3 Lianna Poghosyan, Hanna Koch, Jeroen Frank, Maartje A.H.J. van Kessel, Geert Cremers,  
4 Theo van Alen, Mike S.M. Jetten, Huub J.M. Op den Camp, Sebastian Luecker\*

5  
6 Department of Microbiology, Radboud University, Heyendaalseweg 135, 6525 AJ Nijmegen,  
7 the Netherlands

8

9 \*Correspondence: [s.luecker@science.ru.nl](mailto:s.luecker@science.ru.nl)

10 **Keywords**

11 Sand filtration; nitrification; comammox *Nitrospira*; methanotrophic bacteria; metagenomics

12 **Highlights**

- 13 • Microbial distribution was mainly influenced by sampling location within the DWTP  
14 • Clade A comammox *Nitrospira* were the dominant nitrifiers in the primary sand filter  
15 • Clade B was most abundant in samples from wall biofilm and the secondary filter  
16 • A novel *Methylophilaceae*-affiliated methanotroph dominated the primary sand filter

17

## 18 **Abstract**

19 Elevated concentrations of ammonium and methane in groundwater can cause severe problems  
20 during drinking water production. To avoid their accumulation, raw water in the Netherlands,  
21 and many other countries, is purified by sand filtration. These drinking water filtration systems  
22 select for microbial communities that mediate the biodegradation of organic and inorganic  
23 compounds. In this study, the active layers and wall biofilm of a Dutch drinking water treatment  
24 plant (DWTP) were sampled at different locations along the filtration units of the plant over  
25 three years. We used high-throughput sequencing in combination with differential coverage  
26 and sequence composition-based binning to recover 56 near-complete metagenome-assembled  
27 genomes (MAGs) with an estimated completion of  $\geq 70\%$  and with  $\leq 10\%$  redundancy. These  
28 MAGs were used to characterize the microbial communities involved in the conversion of  
29 ammonia and methane. The methanotrophic microbial communities colonizing the wall  
30 biofilm (WB) and the granular material of the primary rapid sand filter (P-RSF) were  
31 dominated by members of the *Methylococcaceae* and *Methylophilaceae*. The abundance of  
32 these bacteria drastically decreased in the secondary rapid sand filter (S-RSF) samples. In all  
33 samples, complete ammonia-oxidizing (comammox) *Nitrospira* were the most abundant  
34 nitrifying guild. Clade A comammox *Nitrospira* dominated the P-RSF, while clade B was most  
35 abundant in WB and S-RSF, where ammonium concentrations were much lower. In  
36 conclusion, the knowledge obtained in this study contributes to understanding the role of  
37 microorganisms in the removal of carbon and nitrogen compounds during drinking water  
38 production. We furthermore found that drinking water treatment plants represent valuable  
39 model systems to study microbial community function and interaction.

## 40 **Introduction**

41 About 97% of all available water on earth is saline. The remaining 3% is freshwater, of which  
42 more than two-thirds is frozen in ice sheets. Thus, only a small fraction of the global freshwater  
43 exists as ground and surface water that is available for drinking water production. According  
44 to the European Commission (EC, 2016), about 50% of drinking water in Europe is produced  
45 from groundwater and 37% from surface water.

46 Groundwater has a relatively constant composition and may contain high concentrations of  
47 iron ( $\text{Fe}^{2+}$ ; 0.9-7.8 mg/L), manganese ( $\text{Mn}^{2+}$ ; 0-0.56 mg/L), ammonium ( $\text{NH}_4^+$ ; 0.1-0.5 mg/L),  
48 and some organic compounds such as methane ( $\text{CH}_4$ ; 0-37 mg/L) (Albers et al., 2015; Li and  
49 Carlson, 2014; Osborn et al., 2011). Elevated concentrations of these compounds in  
50 groundwater can cause severe problems during drinking water production and distribution  
51 (Okoniewska et al., 2007; Rittmann et al., 2012; Sharma et al., 2005). Biofiltration (e.g., rapid  
52 (RSF) or slow (SSF) sand filtration, granular activated carbon filters) are widely applied  
53 methods for the removal of the above-mentioned compounds. Biofilters harbor complex  
54 microbial communities that are introduced via the source water (Yang et al., 2016) and are  
55 shaped by the configuration of the treatment process (Li et al., 2017; Pinto et al., 2012). In the  
56 filtration units microbial growth is stimulated on filter material, mediating the biodegradation  
57 of organic and inorganic compounds (Proctor and Hammes, 2015). Gases such as methane,  
58 hydrogen sulfide, carbon dioxide, and other volatile compounds are removed from the  
59 groundwater through gas exchange systems (Trussell et al., 2012). The increased dissolved  
60 oxygen in the water caused by this mechanical aeration step serves as an electron acceptor in  
61 microbially mediated oxidative reactions, which may ensure the near-complete nutrient  
62 removal in the biologically active layer of the sand filters.

63 One of the main groundwater contaminants is ammonium. Excess ammonium in raw water is  
64 often associated with microbiological, chemical and sanitary problems in drinking water

65 distribution systems, such as excessive biofilm growth, pH decrease, pipe corrosion, and  
66 elevated nitrite and nitrate levels (Beech and Sunner, 2004; Camper, 2004; Rittmann et al.,  
67 2012). In engineered systems, such as drinking water treatment plants (DWTP), ammonium  
68 removal is achieved by the activity of nitrifying microorganisms that oxidize ammonia to  
69 nitrate via a series of intermediates. While canonical nitrifying guilds perform ammonia- and  
70 nitrite-oxidation in a tight interplay, complete ammonia-oxidizing (comammox) bacteria of the  
71 genus *Nitrospira* possess all proteins necessary to perform nitrification on their own (Daims et  
72 al., 2015; van Kessel et al., 2015). Nitrifying microbial communities of rapid sand filters have  
73 been studied before and seem to be represented by different groups of nitrifiers (Albers et al.,  
74 2015; Fowler et al., 2018; Gülay et al., 2016; Oh et al., 2018; Palomo et al., 2016; Pinto et al.,  
75 2015; van der Wielen et al., 2009). In these systems, nitrification can be limited by the  
76 availability of vital nutrients for this process, such as phosphate and copper. This can cause  
77 incomplete nitrification (de Vet et al., 2012; Wagner et al., 2016), leading to incomplete  
78 ammonium removal and/or nitrite accumulation (Wilczak et al., 1996), and microbial after-  
79 growth in the distribution network (Rittmann et al., 2012).

80 Methane is a colorless and odorless gas that usually does not present a health risk in drinking  
81 water. However, methane gas is highly flammable and can be explosive at elevated  
82 concentrations, and it also can serve as substrate for growth of microorganisms in distribution  
83 systems. Most of the methane is removed by the mechanical aeration step and remaining  
84 amounts are oxidized by aerobic methanotrophs within the sand beds of the filter units.  
85 Correspondingly, a number of studies reported methane-oxidizing bacteria colonizing the  
86 granular material of the sand filters (Albers et al., 2015; Gülay et al., 2016; Palomo et al., 2016).  
87 However, in contrast to nitrifying microbial communities, methanotrophs in these engineered  
88 systems are traditionally less well studied. Methane is a potent greenhouse gas, with a global  
89 warming potential of 34 CO<sub>2</sub> equivalents over 100 years (Stocker et al., 2013) and the removal

90 of most methane from the drinking water via aeration causes methane emissions to the  
91 atmosphere, contributing to global warming and climate change (Maksimavičius and Roslev,  
92 2020).

93 Like in many European countries, groundwater is the primary source (65%) for drinking water  
94 production in the Netherlands (Dutch Drinking Water Statistics 2017). In this study, we used  
95 genome-resolved metagenomics and gene-centric approaches to analyze microbial  
96 communities in a Dutch DWTP, with a special focus on ammonia- and methane-oxidizing  
97 microorganisms. The groundwater entering this DWTP contains elevated concentrations of  
98 organic ( $\text{CH}_4$ , 5.2 mg/L) and inorganic ( $\text{NH}_4^+$ , 0.66 mg/L;  $\text{Fe}^{2+}$ , 8.4 mg/L;  $\text{Mn}^{2+}$ , 0.18 mg/L)  
99 nutrients, which are removed in two sequential rapid sand filters. Thus, this DWTP represents  
100 an interesting model system to study microbial communities involved in the conversion and  
101 removal of these compounds. Metagenomic analysis of samples taken at different stages within  
102 this DWTP revealed the key microorganisms involved in ammonia- and methane-oxidation,  
103 including novel methanotrophic bacteria from the *Methylophilaceae* family, which were  
104 assumed previously to comprise only methylotrophic bacteria.

## 105 **Materials and Methods**

### 106 *Sample collection and trace element analysis*

107 Samples were obtained from the pumping station Breehei, a drinking water treatment facility  
108 located in Venray, the Netherlands (51°28'54.6"N; 5°59'10.2"E), operated by NV Waterleiding  
109 Maatschappij Limburg. Drinking water is produced from groundwater. Samples from the  
110 active layers of primary and secondary rapid sand filters (P-RSF and S-RSF) were collected in  
111 50 ml sterile falcon tubes in June 2016 and September 2018. Samples from the biofilm formed  
112 on the walls of the primary sand filter (WB) were taken in June 2016, May 2017 and September  
113 2018 (Figure 1). All samples were transferred to the laboratory within 4 h, and were stored at

114 4°C for further analysis. Water quality parameters were determined by Aqualab Zuid  
 115 (<https://www.aqualab.nl>) over the period 2000-2016 (Table 1).

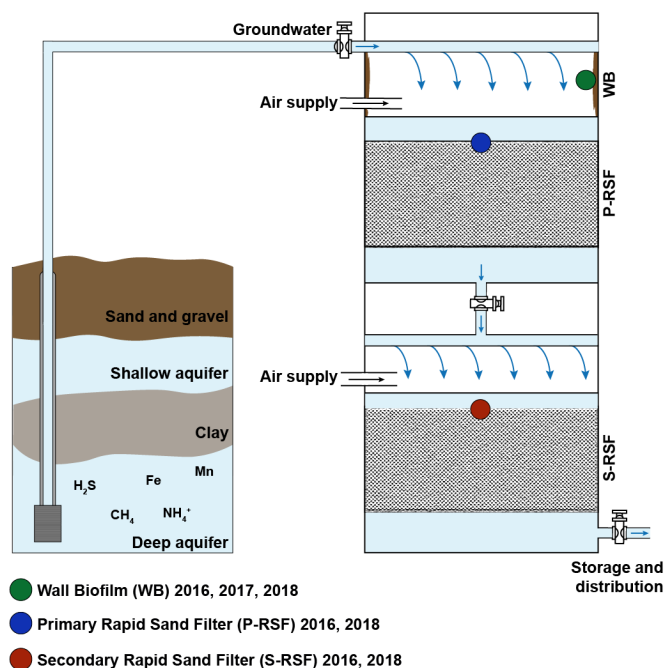

116  
 117 **Figure 1.** Schematic illustration of DWTP Breehei. Sampling locations are indicated by colored dots,  
 118 sampling timepoints (in years only) for each location are indicated.

119 **Table 1.** Average water quality parameters of the incoming groundwater and at different stages along  
 120 the treatment train.

| Unit (mg L <sup>-1</sup> )                   | Ground-water | After aeration | P-RSF effluent | S-RSF effluent | Drinking water | WML standard <sup>a</sup> |
|----------------------------------------------|--------------|----------------|----------------|----------------|----------------|---------------------------|
| <b>Methane (CH<sub>4</sub>)</b>              | 5.2          | 1.2            | 0.012          | 0.012          | 0.012          | 0.5                       |
| <b>Ammonium (NH<sub>4</sub><sup>+</sup>)</b> | 0.66         | 0.65           | 0.0145         | 0.039          | 0.039          | 0.1                       |
| <b>Nitrite (NO<sub>2</sub><sup>-</sup>)</b>  | 0.0046       | *              | 0.063          | 0.0082         | 0.0041         | 0.05                      |
| <b>Nitrate (NO<sub>3</sub><sup>-</sup>)</b>  | 0.13         | *              | *              | *              | 1.64           | 40                        |
| <b>Oxygen (O<sub>2</sub>)</b>                | 0.4          | 9.1            | 5.0            | 10.2           | 10.2           | -                         |
| <b>Carbon dioxide (CO<sub>2</sub>)</b>       | 42.38        | *              | 18             | 6.16           | 6.95           | -                         |
| <b>Iron (Fe)</b>                             | 8.4          | *              | 0.11           | 0.053          | 0.043          | 0.1                       |
| <b>Manganese (Mn)</b>                        | 0.18         | *              | 0.022          | 0.0079         | 0.0052         | 0.025                     |

121 \* Not applicable or were not analyzed  
 122 - No standards  
 123 <sup>a</sup>Defined by Waterleiding Maatschappij Limburg

124 Methane uptake

125 Methane-oxidizing capacity was determined for the P-RSF and WB samples collected in 2016.  
 126 For the P-RSF, 2.5, 5, 10, and 20 g of sand material were mixed with 20 ml top water. After

127 settling of the sand, overlaying water samples (20 ml) were transferred into 120 ml serum  
128 bottles with  $\pm 14.5$  mg/L CH<sub>4</sub> in the headspace and incubated at room temperature in a shaking  
129 incubator (200 rpm). For the WB sample, the incubations were conducted in triplicates using  
130 1 and 2.5 g of biomass. CH<sub>4</sub> concentrations were determined by sampling 300  $\mu$ L headspace,  
131 which were injected in triplicates into a HP 5890 gas chromatograph (Hewlett Packard, Palo  
132 Alto, CA).

### 133 DNA extractions

134 DNA from samples for Illumina sequencing was extracted using two different methods to  
135 obtain differential abundance information. DNA from 2016 samples was extracted with  
136 DNeasy Blood & Tissue Kit (Qiagen Ltd., West Sussex, United Kingdom) and PowerSoil DNA  
137 Isolation Kit (MO BIO Laboratories, Carlsbad, CA, USA). Samples (0.5 g) were mechanically  
138 disrupted using a TissueLyser (Qiagen) for 2 x 30 seconds at 30 Hz, followed by DNA  
139 extractions according to the manufacturer's instructions. For the extraction of DNA from  
140 samples collected in 2017 and 2018, the DNeasy Blood & Tissue kit was replaced by  
141 ammonium acetate (Kowalchuk et al., 2004) and CTAB (Zhou et al., 1996) based extraction  
142 methods, respectively.

143 For long read Nanopore sequencing, DNA was extracted from P-RSF samples collected in  
144 2016 and 2018 using the CTAB-based extraction method. To avoid shearing of genomic DNA,  
145 all bead-beating and vortexing steps were replaced by carefully inverting the tubes several  
146 times, and all the pipetting steps were performed using cut-off pipette tips. Genomic DNA was  
147 purified twice by phenol:chloroform:isoamyl alcohol (25:24:1) phase extraction (Zhou et al.,  
148 1996). Extracted DNA was resuspended in nuclease-free water and stored at 4°C.

149 *Illumina library preparation and sequencing*

150 For Illumina library preparation, the Nextera XT kit (Illumina, San Diego, CA, USA) was used  
151 according to the manufacturer's instructions. Enzymatic tagmentation was performed using 1  
152 ng of DNA per sample, followed by incorporation of the indexed adapters and library  
153 amplification. After subsequent purification using AMPure XP beads (Beckman Coulter,  
154 Indianapolis, IN, USA), libraries were checked for quality and size distribution using the 2100  
155 Bioanalyzer with the High Sensitivity DNA kit (Agilent, Santa Clara, CA, USA). Library  
156 quantitation was performed by Qubit using the Qubit dsDNA HS Assay Kit (Thermo Fisher  
157 Scientific, Waltham, MA, USA). After dilution to 4 nM final concentration, the libraries were  
158 pooled, denatured, and sequenced on an Illumina MiSeq. Paired-end sequencing of 2 x 300  
159 base pairs was performed using the Illumina MiSeq Reagent Kit v3 according to the  
160 manufacturer's protocol.

161 *Nanopore library preparation and sequencing*

162 For Nanopore library preparation, 1 - 1.5 µg of DNA, measured by Qubit with the Qubit  
163 dsDNA HS Assay Kit (Thermo Fisher Scientific, Waltham, MA, USA), was used. The input  
164 DNA was quality-checked by agarose gel electrophoresis to contain only high molecular DNA  
165 and show no degradation. For sequencing, DNA Library construction was performed using the  
166 Ligation Sequencing Kit 1D (SQK-LSK108) in combination with the Native Barcoding  
167 Expansion Kit (EXP-NBD103 or EXP-NBD104) according to the manufacturer's protocol  
168 (Oxford Nanopore Technologies, Oxford, UK). Fragments were end-repaired using the  
169 NEBNext® FFPE DNA Repair Mix (New England Biolabs, Ipswich, MA, USA), with  
170 subsequent fragment purification using AMPure XP beads (Beckman Coulter Life Sciences,  
171 Indianapolis, IN, USA). End repair and dA-tailing was done using the NEBNext® Ultra™ II  
172 End Repair/dA-Tailing Module (New England Biolabs) followed by a cleanup of the fragments



173 using AMPure XP beads. Selected barcodes for each sample were ligated using the Blunt/TA  
174 Ligase Master Mix (New England Biolabs) and the resulting fragments were purified using  
175 AMPure XP beads. The DNA concentration of all libraries was measured by Qubit using the  
176 dsDNA HS Assay Kit and pooled to a maximum of 700 ng DNA. Subsequently, adapters were  
177 ligated using the NEBNext® Quick Ligation Module (New England Biolabs). After purification  
178 using AMPure XP beads, the pooled libraries were quantified again using Qubit. The libraries  
179 were loaded on a Flow Cell (R9.4.1) and run on a MinION device (Oxford Nanopore  
180 Technologies, Oxford, UK), according to the manufacturer's instructions. Base calling after  
181 sequencing was done using Albacore v2.1.10, (Oxford Nanopore Technologies) for the 2016  
182 and guppy\_basecaller in combination with guppy\_barcode (Oxford Nanopore Technologies,  
183 Limited Version 2.3.7+e041753) for the 2018 sample.

#### 184 *Assembly*

185 Raw Illumina sequence data were processed for quality-trimming, adapter removal, and  
186 contamination-filtering, using BBDUK (BBTOOLS v37.17; [http://jgi.doe.gov/data-and-](http://jgi.doe.gov/data-and-tools/bbtools/bb-tools-user-guide/bbduk-guide/)  
187 [tools/bbtools/bb-tools-user-guide/bbduk-guide/](http://jgi.doe.gov/data-and-tools/bbtools/bb-tools-user-guide/bbduk-guide/)). All sequencing reads from the same sampling  
188 location were co-assembled using metaSPAdes v3.10.1 (Nurk et al., 2017) with the following  
189 parameters: k-mer sizes 21, 33, 55, 77, 99 and 127, minimum contig length 1500 bp. Raw  
190 Nanopore reads were quality trimmed using Filtlong v0.2.0  
191 (<https://github.com/rrwick/Filtlong>) with minimum read length 1000 bp and error rate <20%.  
192 Porechop v0.2.4 (<https://github.com/rrwick/Porechop>) was used to remove adapters and split  
193 chimeric reads with default settings. Trimmed reads were assembled using Canu v1.8 (Koren  
194 et al., 2017) with minimum read length 1000, corrected read error rate 0.105, and genome size  
195 5m. To correct error rates, the trimmed Nanopore reads were mapped to the assembly using  
196 Minimap2 v2.16-r922 (Li, 2018), which then was polished with Racon v1.3.1 (Vaser et al.,

197 2017). Subsequently, Racon v1.3.1 was used to further polish the assembly twice with Illumina  
198 reads obtained from the 2018 P-RSF sample.

### 199 Metagenome binning

200 Differential coverage information was determined by separately mapping the sequencing reads  
201 from each sample and DNA extraction method against the obtained co-assemblies, using  
202 Burrows-Wheeler Aligner v0.7.15 (BWA) (Li and Durbin, 2010) and employing the “mem”  
203 algorithm. For Canu assembly, only the Illumina reads from P-RSF 2018 samples were  
204 mapped. The generated sequence alignment map (SAM) files were converted to binary format  
205 (BAM) using SAMtools (Li et al., 2009). Metagenome binning was performed using anvi'o  
206 v5.3 (Eren et al., 2015). Anvi'o's Snakemake-based (Koster and Rahmann, 2012) contigs  
207 workflow was used to generate contig databases from each Illumina and Nanopore  
208 assembly. Shortly, anvi'o employs Prodigal v2.6.3 (Hyatt, 2010) to identify open reading  
209 frames (ORFs) and HMMER v3.2 (Eddy, 2011) to identify archaeal (Rinke et al., 2013) and  
210 bacterial (Campbell et al., 2013) single-copy core genes. The Cluster of Orthologous Groups  
211 of proteins (COG) database (Tatusov et al., 1997) together with Centrifuge v1.0.3-beta (Kim  
212 et al., 2016) was used to annotate genes in the contig databases. Each BAM file was profiled  
213 to obtain differential coverage and statistical information based on mapping results and to  
214 generate merged profile databases. The contigs were then automatically clustered with  
215 CONCOCT (Alneberg et al., 2014), followed by manual binning and bin refinement using  
216 the anvi'o interactive interface (Delmont and Eren, 2016; Eren et al., 2015). Completeness  
217 and contamination (referred to as redundancy in this study) of bins was assessed by CheckM  
218 v1.01.11 (Parks et al., 2015), which uses pplacer v1.1 alpha 19 (Matsen et al., 2010) to  
219 identify and quantify single-copy marker genes. Based on the suggested standards (Bowers  
220 et al., 2017), the bins were defined as high-quality (>90% complete and <5% redundancy,

221 complete small subunit rRNA operon,  $\geq 18$  tRNAs) and medium-quality ( $\geq 70\%$  complete  
222 and  $< 10\%$  redundancy) metagenome-assembled genomes (MAGs).

### 223 Dereplication and taxonomic classification of MAGs

224 MAGs were dereplicated using dRep v2.2.3 (Olm et al., 2017) at 99% average nucleotide  
225 identity (ANI) for clustering. Within each cluster, the best MAG was selected based on  
226 completeness ( $\geq 70\%$ ), redundancy ( $< 10\%$ ), N50 of contigs, and fragmentation. GTDB-Tk  
227 v0.3.2 (Parks et al., 2018) was used for taxonomic assignment of the final MAGs. Phyla are  
228 named according to the recently suggested nomenclature (Whitman et al., 2018) using  
229 standardized phylum suffix -ota.

### 230 Abundance estimation of MAGs

231 To calculate the relative abundance of the dereplicated MAGs in each sample, reads from  
232 all samples were individually mapped to each co-assembly using BWA v0.7.15 (Li and  
233 Durbin, 2010) as described above. The coverage of each MAG was calculated using CheckM  
234 v1.01.11 (minimum alignment length 0.95) (Parks et al., 2015) and was normalized by  
235 multiplying this coverage with a normalization factor (sequencing depth of the largest  
236 sample divided by the sequencing depth of each individual sample). The distribution of  
237 MAGs was calculated as percentages by dividing a MAG's coverage in each sample by the  
238 total coverage of the respective MAG in all samples.

### 239 Functional analysis

240 For the gene-centric approach, co-assembly across all samples was performed using  
241 MEGAHIT v1.1.1-2 (Li et al., 2015). Open reading frames (ORFs) in the MAGs obtained  
242 above and the new co-assembly were predicted using Prodigal v2.6.3 (Hyatt, 2010), which was  
243 set to include partial ORFs. Custom-build hidden Markov models (HMMs) (Eddy, 2011) of

244 specific marker proteins were used (Supplementary material and methods) to annotate all ORFs  
245 using *hmmsearch* (HMMER v3.1b2; <http://hmmer.org>). The HMM for RNA polymerase  
246 subunit beta (*RpoB*) was downloaded from FunGene (Fish et al., 2013). Remaining ORFs in  
247 the MAGs were annotated using Prokka v1.12-beta (Seemann, 2014). The annotations of all  
248 genes discussed in this study were confirmed by BLAST against the TrEMBL, Swiss-Prot and  
249 NCBI nr databases. Subcellular localization of the proteins was predicted by SignalP 5.0  
250 (Armenteros et al., 2019) and TMHMM 2.0 (Krogh et al., 2001).  
251 Functional gene-based abundances of ammonia- and methane-oxidizing microorganisms were  
252 estimated using competitive metagenomic read recruitment to ensure unique mapping. For this,  
253 reads from each metagenomic sample were mapped using *bowtie2* v2.3.1 (Langmead and  
254 Salzberg, 2012) in ‘-very-sensitive’ mode against extracted partial and complete sequences of  
255 *rpoB* and the ammonia as well as the particulate and soluble methane monooxygenase subunit  
256 A/alpha genes (*amoA*, *pmoA* and *mmoX*, respectively). SAMtools *flagstat* v1.6 (Li et al., 2009)  
257 was used to obtain the number of mapped reads. Reads per kilo base per million mapped reads  
258 (RPKM)-values were used to correct for differences in sequencing depth and gene length. To  
259 estimate the relative abundance of microorganisms encoding ammonia and methane  
260 monooxygenases in each sample, the normalized read counts were calculated as fraction of  
261 the normalized read counts of the identified *rpoB* genes.

## 262 Phylogenomic and phylogenetic analyses

263 The up-to-date bacterial core gene (UBCG) pipeline (Na et al., 2018) with default parameters  
264 was used to extract and concatenate bacterial core gene sets. To infer the phylogeny of the  
265 archaeal MAGs, the *anvi'o* phylogenomic workflow  
266 (<http://merenlab.org/2017/06/07/phylogenomics>) was used to individually align and  
267 concatenate 162 archaeal single-copy genes. Maximum-likelihood trees were calculated using  
268 RAxML version 8.2.10 (Stamatakis, 2014) on the CIPRES science gateway (Miller et al.,

269 2010). For details, see Supplementary Methods. Amino acid sequences of type II DMSO  
270 reductase-family enzymes, and of ammonia and methane monooxygenases were aligned using  
271 ARB v5.5 (Ludwig et al., 2004). The maximum-likelihood trees were calculated using RAxML  
272 HPC-HYBRID v.8.2.12 on the CIPRES and IQ-tree webserver (Trifinopoulos et al., 2016) as  
273 described in Supplementary Methods. All phylogenetic trees were visualized in iTOL (Letunic  
274 and Bork, 2016).

### 275 *Data visualization*

276 Manuscript figures were generated using ggplot2 (Wickham, 2016), Rstudio (Racine, 2012)  
277 and the anvi'o interactive interface ([http://merenlab.org/2016/02/27/the-anvio-interactive-](http://merenlab.org/2016/02/27/the-anvio-interactive-interface)  
278 [interface](http://merenlab.org/2016/02/27/the-anvio-interactive-interface)).

## 279 **Results**

### 280 *DWTP performance*

281 The produced water quality analyses (Table 1) showed that methane, ammonium, nitrite and  
282 nitrate were well below the required quality standards. Most of the methane in the raw water  
283 was removed during the aeration step and the remainder was oxidized in the P-RSF.  
284 Pronounced ammonia oxidation in P-RSF resulted in nitrite accumulation in the effluent of this  
285 filter, which was subsequently removed in the S-RSF. Similarly, the Fe<sup>2+</sup> and Mn<sup>2+</sup> removal  
286 efficiency of the system was very high (>99%). In addition, we determined methane uptake  
287 rates in the P-RSF and WB samples. Complete methane oxidation was achieved in all samples  
288 within 5 to 8 days of incubation, except for the control containing only raw water (Figure S1).  
289 Methane consumption in P-RSF samples increased with an increasing amount of sand material,  
290 whereas no significant difference in methane uptake was detected between the incubations with  
291 1 and 2.5 g of WB biomass (Figure S1). The identical oxidation rates in the incubations with

292 WB biomass seem counterintuitive, but may be caused by sample inhomogeneity and uneven  
293 distribution of methanotrophic bacteria within the biofilm.

#### 294 Recovery of metagenome-assembled genomes

295 Over the period 2016 to 2018 a total of 7 samples from DWTP Breehei were collected (Figure  
296 1) and sequenced. This resulted in a total of 125 million paired-end Illumina sequencing reads.  
297 For each sample location more than 70% of the respective reads could be co-assembled into  
298 ~413, 184, and 249 Mb sequencing data for WB, P-RSF, and S-RSF, respectively (Table S1).  
299 In addition, P-RSF samples were also sequenced using the Oxford Nanopore long-read  
300 platform to improve the assembly of the most abundant microorganisms. Overall, binning of 4  
301 individual metagenome assemblies based on sequence composition and differential coverage  
302 patterns resulted in 78 near-complete Illumina and 7 Nanopore MAGs (Table S2). All MAGs  
303 obtained from Illumina co-assemblies as well as the Nanopore assembly were dereplicated at  
304 strain level (99% ANI), which yielded 50 medium and 6 high-quality (MIMAG standards;  
305 Bowers et al., 2017) non-redundant MAGs (Table 2, Table S2) that were used for downstream  
306 analyses. Given the high number of single nucleotide variants observed during bin refinement  
307 using the anvio interactive interface, 15 MAGs were categorized as population-level genomes  
308 (Table 2). All MAGs were classified at the lowest possible taxonomic level using GTDB-tk  
309 (Parks et al., 2018), indicating affiliation with 1 archaeal and 12 different bacterial phyla  
310 (Figure 2, Table 2).

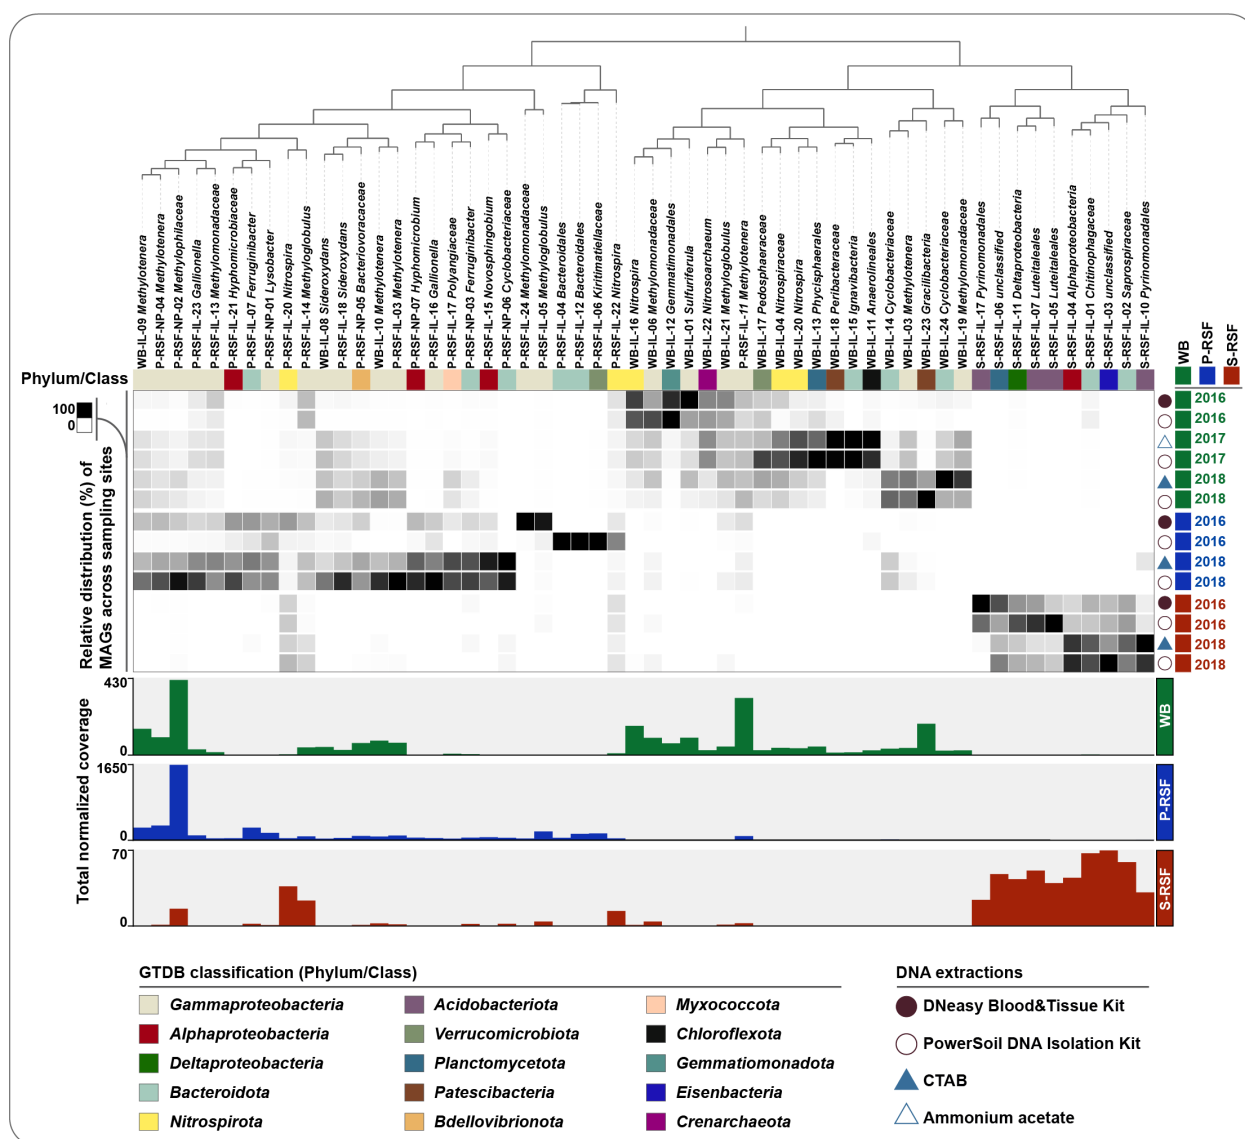

311

312 **Figure 2.** Overview of the distribution, coverage and classification of 56 dereplicated medium- and  
 313 high-quality MAGs recovered from the DWTP Breehei metagenomes. MAGs are organized based on  
 314 their relative distribution in the DWTP sample locations using Euclidean distance and Ward linkage as  
 315 implemented in the *anvi'o* interactive interface. The phylogenetic affiliation of the MAGs based on  
 316 GTDB classification is indicated by colored boxes. The heatmap indicates the percent coverage of each  
 317 MAG in a given metagenome. The bar plots show the total normalized coverage of each MAG per  
 318 sampling site.

319 **Table 2.** General characteristics of MAGs recovered from DWTP Breehei metagenomes.

| MAG ID <sup>a</sup> | Classification <sup>b</sup>  | Completeness (%) <sup>c</sup> | Redundancy (%) <sup>c</sup> | Length (Mb) | N50     | Number contigs | MIMAG <sup>d</sup> quality |
|---------------------|------------------------------|-------------------------------|-----------------------------|-------------|---------|----------------|----------------------------|
| P-RSF-IL-03         | g. <i>Methylothera</i>       | 99.57                         | 0.43                        | 2.48        | 204,148 | 20             | Medium                     |
| P-RSF-IL-04         | o. <i>Bacteroidales</i>      | 95.70                         | 1.09                        | 4.38        | 46,595  | 154            | Medium                     |
| P-RSF-IL-05         | g. <i>Methyloglobulus</i>    | 99.25                         | 0.82                        | 3.87        | 67,388  | 99             | Medium                     |
| P-RSF-IL-06         | f. <i>Kiritimatiellaceae</i> | 93.41                         | 1.38                        | 2.21        | 572,251 | 7              | High                       |
| P-RSF-IL-07         | g. <i>Ferruginibacter</i>    | 96.50                         | 1.72                        | 3.05        | 104,094 | 43             | Medium                     |

|                          |                       |       |      |      |           |      |        |
|--------------------------|-----------------------|-------|------|------|-----------|------|--------|
| P-RSF-IL-11 <sup>a</sup> | g_Methylothera        | 98.18 | 0.96 | 2.48 | 30,410    | 142  | Medium |
| P-RSF-IL-12              | o_Bacteroidales       | 98.57 | 3.28 | 5.54 | 156,716   | 53   | Medium |
| P-RSF-IL-13              | f_Methylomonadaceae   | 95.12 | 1.33 | 3.91 | 14,718    | 373  | Medium |
| P-RSF-IL-14 <sup>a</sup> | g_Methyloglobulus     | 76.88 | 6.08 | 3.76 | 6,341     | 643  | Medium |
| P-RSF-IL-15 <sup>a</sup> | g_Novosphingobium     | 90.61 | 0.92 | 2.43 | 12,194    | 277  | Medium |
| P-RSF-IL-16              | g_Gallionella         | 85.00 | 2.45 | 2.00 | 12,610    | 203  | Medium |
| P-RSF-IL-17              | f_Polyangiaceae       | 85.52 | 6.71 | 9.19 | 8,612     | 1283 | Medium |
| P-RSF-IL-18              | g_Sideroxydans        | 97.36 | 5.02 | 2.47 | 19,722    | 202  | Medium |
| P-RSF-IL-20              | g_Nitrospira          | 90.17 | 3.45 | 3.85 | 9,698     | 498  | Medium |
| P-RSF-IL-21              | f_Hyphomicrobiaceae   | 83.07 | 1.45 | 3.92 | 8,625     | 562  | Medium |
| P-RSF-IL-22 <sup>a</sup> | g_Nitrospira          | 74.42 | 1.95 | 2.60 | 5,252     | 519  | Medium |
| P-RSF-IL-23 <sup>a</sup> | g_Gallionella         | 73.19 | 5.24 | 1.91 | 6,356     | 338  | Medium |
| P-RSF-IL-24              | f_Methylomonadaceae   | 91.70 | 2.96 | 3.55 | 13,253    | 354  | Medium |
| P-RSF-NP-01              | g_Lysobacter          | 99.95 | 1.45 | 4.15 | 4,155,120 | 1    | High   |
| P-RSF-NP-02 <sup>a</sup> | f_Methylophilaceae    | 97.86 | 1.71 | 3.20 | 2,013,186 | 4    | High   |
| P-RSF-NP-03              | g_Ferruginibacter     | 94.09 | 0.00 | 5.44 | 2,880,874 | 5    | Medium |
| P-RSF-NP-04 <sup>a</sup> | g_Methylothera        | 91.45 | 0.88 | 2.48 | 542,553   | 11   | High   |
| P-RSF-NP-05              | f_Bacteriovoracaceae  | 90.62 | 1.84 | 3.58 | 236,271   | 21   | High   |
| P-RSF-NP-06              | f_Cyclobacteriaceae   | 98.36 | 0.55 | 4.64 | 3,263,186 | 2    | Medium |
| P-RSF-NP-07 <sup>a</sup> | g_Hyphomicrobium      | 94.04 | 2.42 | 3.94 | 80,300    | 69   | Medium |
| S-RSF-IL-01              | f_Chitinophagaceae    | 98.03 | 0.25 | 3.85 | 72,704    | 83   | Medium |
| S-RSF-IL-02              | f_Saprospiraceae      | 98.77 | 0.64 | 3.97 | 34,568    | 196  | Medium |
| S-RSF-IL-03              | p_Eisenbacteria       | 96.15 | 1.10 | 3.80 | 25,445    | 215  | High   |
| S-RSF-IL-04              | c_Alphaproteobacteria | 94.77 | 2.33 | 4.03 | 18,338    | 319  | Medium |
| S-RSF-IL-05              | o_Luteitales          | 75.98 | 0.85 | 3.27 | 6,665     | 554  | Medium |
| S-RSF-IL-06              | p_Planctomycetota     | 81.72 | 4.15 | 4.12 | 6,813     | 693  | Medium |
| S-RSF-IL-07              | o_Luteitales          | 94.25 | 4.27 | 4.86 | 35,344    | 183  | Medium |
| S-RSF-IL-10              | o_Pyrinomonadales     | 74.62 | 1.28 | 3.49 | 7,085     | 579  | Medium |
| S-RSF-IL-11              | c_Deltaproteobacteria | 84.08 | 3.36 | 5.77 | 9,024     | 795  | Medium |
| S-RSF-IL-17              | o_Pyrinomonadales     | 70.36 | 3.42 | 6.08 | 5,250     | 1235 | Medium |
| WB-IL-01                 | g_Sulfuriferula       | 97.63 | 0.24 | 2.17 | 89,907    | 40   | Medium |
| WB-IL-03                 | g_Methylothera        | 98.72 | 2.14 | 2.61 | 26,003    | 159  | Medium |
| WB-IL-04                 | f_Nitrospiraceae      | 96.76 | 3.18 | 3.58 | 54,739    | 105  | Medium |
| WB-IL-06                 | f_Methylomonadaceae   | 99.88 | 0.45 | 4.27 | 93,669    | 82   | Medium |
| WB-IL-08                 | g_Sideroxydans        | 98.57 | 2.30 | 2.50 | 25,161    | 145  | Medium |
| WB-IL-09 <sup>a</sup>    | g_Methylothera        | 88.16 | 1.96 | 2.16 | 16,133    | 197  | Medium |
| WB-IL-10 <sup>a</sup>    | g_Methylothera        | 90.61 | 1.71 | 2.11 | 17,763    | 172  | Medium |
| WB-IL-11 <sup>a</sup>    | o_Anaerolineales      | 90.91 | 0.91 | 3.93 | 42,863    | 132  | Medium |
| WB-IL-12                 | o_Gemmatimonadales    | 93.41 | 2.75 | 3.81 | 15,101    | 349  | Medium |
| WB-IL-13                 | o_Phycisphaerales     | 94.89 | 2.27 | 5.04 | 34,488    | 268  | Medium |
| WB-IL-14                 | f_Cyclobacteriaceae   | 93.03 | 1.74 | 4.77 | 12,449    | 498  | Medium |
| WB-IL-15                 | c_Ignavibacteria      | 89.05 | 1.38 | 3.73 | 10,944    | 428  | Medium |
| WB-IL-16 <sup>a</sup>    | g_Nitrospira          | 88.52 | 5.00 | 3.54 | 11,765    | 422  | Medium |
| WB-IL-17                 | f_Pedosphaeraceae     | 95.83 | 6.76 | 5.57 | 27,453    | 284  | Medium |
| WB-IL-18                 | f_Peribacteraceae     | 77.59 | 2.42 | 1.51 | 15,391    | 130  | Medium |
| WB-IL-19                 | f_Methylomonadaceae   | 85.23 | 4.06 | 3.60 | 8,377     | 507  | Medium |
| WB-IL-20 <sup>a</sup>    | g_Nitrospira          | 92.44 | 2.32 | 3.78 | 41,484    | 143  | Medium |
| WB-IL-21                 | g_Methyloglobulus     | 83.76 | 5.07 | 3.38 | 6,990     | 545  | Medium |
| WB-IL-22 <sup>a</sup>    | g_Nitrosoarchaeum     | 84.63 | 3.64 | 1.21 | 6,275     | 213  | Medium |
| WB-IL-23 <sup>a</sup>    | c_Gracilibacteria     | 85.39 | 1.12 | 1.36 | 116,994   | 25   | Medium |
| WB-IL-24                 | f_Cyclobacteriaceae   | 76.45 | 2.08 | 3.03 | 6,398     | 532  | Medium |

320 \* ID indicates from which co-assembly (assembly) the MAGs were recovered. IL – Illumina co-assemblies, NP – Nanopore  
 321 assembly

322 <sup>a</sup>Population level genome

323 <sup>b</sup>Based on GTDB classification (Parks et al., 2018)

324 <sup>c</sup>Based on lineage-specific marker sets determined with CheckM (Parks et al., 2015)

325 <sup>d</sup>Defined by (Bowers et al., 2017)



326 *Distribution and taxonomic composition of the DWTP microbiome*

327 The influence of sampling location, sampling time, and DNA extraction method on the  
328 distribution of recovered MAGs was analyzed by hierarchical clustering using Euclidean  
329 distance metrics with a Ward linkage algorithm, allowing grouping of the MAGs based on their  
330 occurrence patterns in the different samples (Figure 2). Overall, the choice of a DNA extraction  
331 method had no pronounced influence on the distribution of MAGs across samples, except for  
332 the samples from P-RSF in 2016. In this specific sample, the normalized coverage values  
333 indicated a strong extraction bias for DNA extracted using the Power soil (P-RSF16\_PS)  
334 compared to the Blood and Tissue kit (P-RSF16\_BT; Table S2). Notably, this bias was not  
335 observed for the 2016 S-RSF samples extracted with the same kits, or for any other DNA  
336 extraction performed using the Power soil kit. It thus is difficult to conceive that the extraction  
337 method was affecting specific members only in the 2016 P-RSF microbial community, and the  
338 reason for the observed bias remains unclear. Overall, the sampling location had the most  
339 substantial effect on microbial diversity and abundance. While some MAGs recovered from  
340 WB and P-RSF were also present in S-RSF, the overall community of the S-RSF community  
341 clearly differed from the other sampling locations (Figure 2). The microbial communities of  
342 WB and P-RSF were generally more similar, but sampling location and time influenced the  
343 relative abundance of MAGs across all samples.

344 To gain insights into the overall microbial community structure and diversity of the DWTP  
345 Breehei, 16S rRNA gene sequences were retrieved directly from the metagenomic assemblies.  
346 Both full-length and partial 16S rRNA gene sequences were used for further analyses, since  
347 only 21 to 32% of 16S rRNA reads were assembled into full-length sequences (Figure S2).  
348 Subsequently, microbial community composition was analyzed at the phylum and family levels  
349 (Figure S3). Although changes in abundance were observed, phylum level classification  
350 revealed no differences in microbial community composition between the sampling locations

351 (Figure S3-A). At the family level, the S-RSF microbial community was clearly distinct from  
352 the WB and P-RSF community (Figure S3-B), corroborating the MAG co-occurrence pattern-  
353 based observations when samples were organized using Euclidian distance and Ward  
354 ordination (Figure 2).

355 16S rRNA gene-based taxonomic profiling identified 14 phyla with relative abundances  $\geq 1\%$   
356 (Figure S3A). *Gammaproteobacteria* (17-67%), *Bacteroidota* (5-17%), *Acidobacteria* (2-  
357 15%), *Alphaproteobacteria* (4-12%), *Planctomycetota* (2-10%) “*Ca. Patescibacteria*” (CPR;  
358 1-7%), and *Nitrospirota* (2-6%) were the most dominant phyla identified in all samples (Figure  
359 S3-A). In most cases, this 16S rRNA gene-based analysis corresponded well to the taxonomic  
360 affiliation of the recovered MAGs. Additionally, one MAG belonging to the candidatus phylum  
361 “*Ca. Eisenbacteria*” and one *Crenarchaeota* (*Thaumarchaeota*) MAG were obtained from WB  
362 and S-RSF (Figure 1), but were of low abundance in the 16S rRNA datasets.

### 363 Genome functional profiling

364 Iron, manganese, reduced sulfur species, ammonium and methane are removed during the  
365 drinking water treatment process. However, our understanding of the microbial and  
366 geochemical processes contributing to removal of these compounds during sand filtration is  
367 still limited. Although iron ( $\text{Fe}^{2+}$ ) oxidation pathways in bacteria are not fully understood, it is  
368 known that certain autotrophic bacteria are responsible for this process. Four *Gallionellaceae*  
369 MAGs (2 *Gallionella*, 2 *Sideroxydans*) were present only in WB and P-RSF metagenomes  
370 (Figure 2), indicating that complete iron removal may already occur in P-RSF. The potential  
371 to use reduced sulfur compounds as electron donor was encoded in *Hyphomicrobiaceae* (P-  
372 RSF-IL-21) and *Sulfuriferula* (WB-IL-01) MAGs (Table S3). To learn more about the  
373 microorganisms driving the removal of methane and ammonium in this rapid sand filtration  
374 system, a genome-resolved metagenomics approach was applied to recover high-quality  
375 genomes of the key ammonia- and methane-oxidizing microorganisms. Subsequently, all

376 recovered MAGs were screened for functional marker proteins involved in nitrification, and  
 377 methane and other one-carbon (C1) compound oxidation (Figure 3, Table S3) using custom-  
 378 build HMM models.

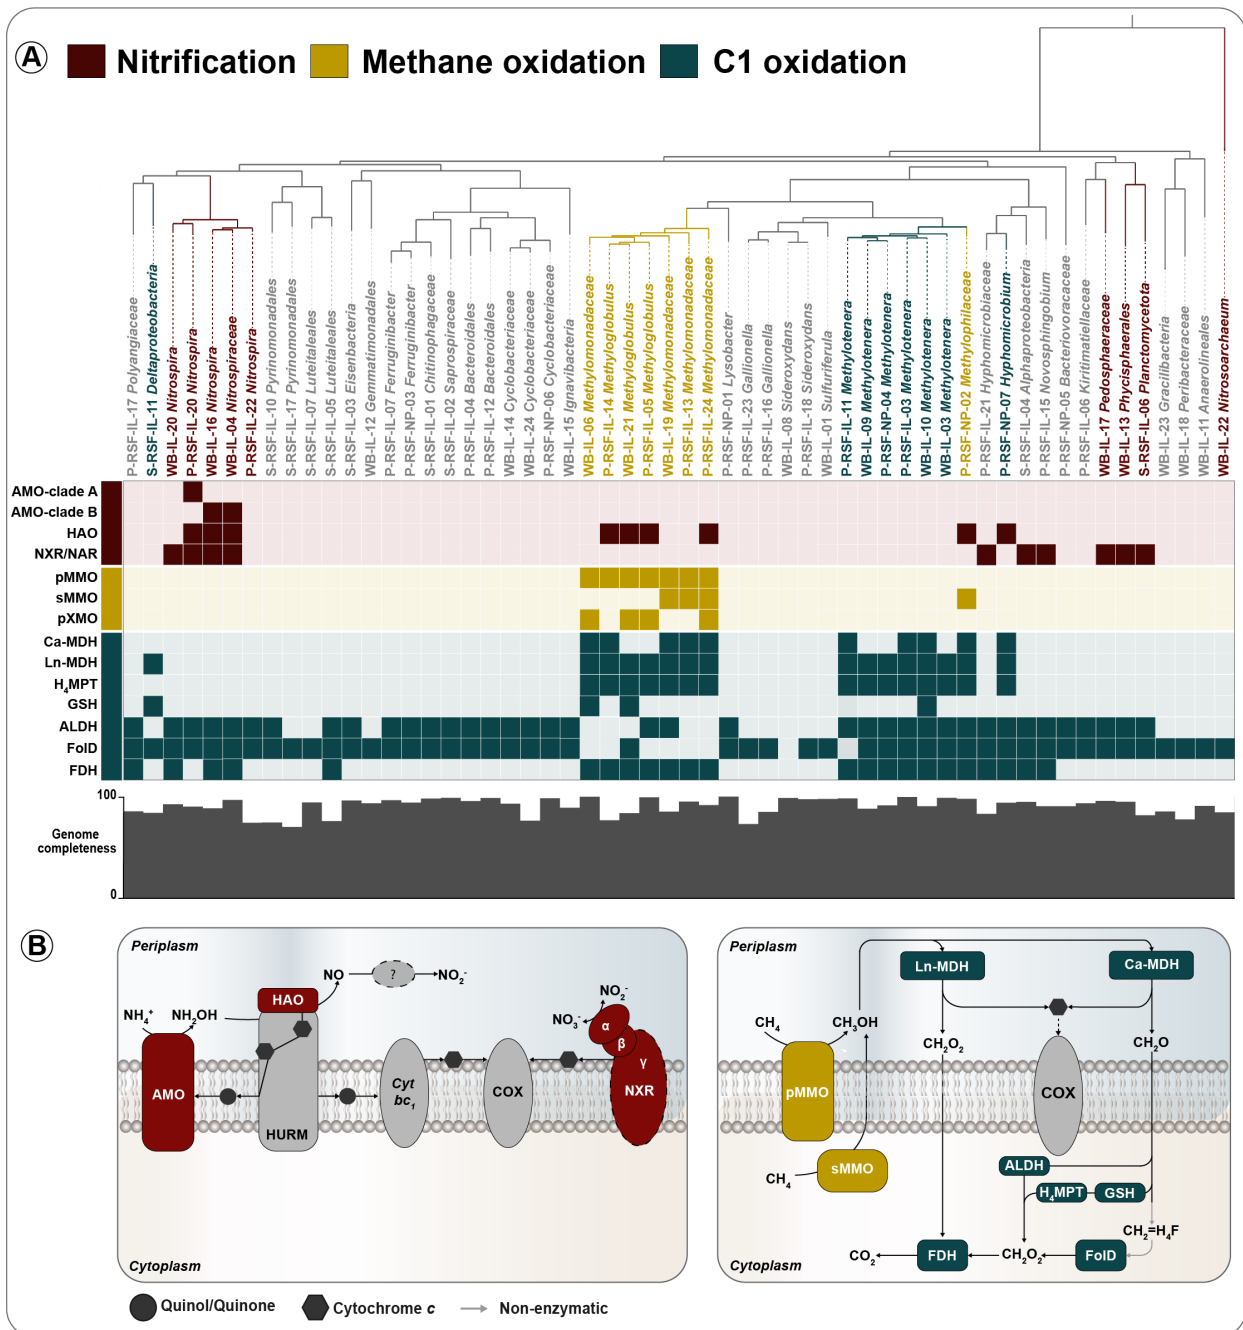

379

380 **Figure 3.** Metabolic potential of the 56 MAGs recovered from DWTP Breehei A. Phylogenetic tree  
 381 based on the concatenated alignment of 49 ribosomal proteins (Table S3) using the anvio  
 382 phylogenomics workflow. Presence or absence of genes for ammonia, nitrite, methane, and C1  
 383 utilization are indicated by filled or shaded colored boxes, respectively. Grey bars represent estimated  
 384 genome completeness. The figure was generated using the anvio interactive interface. **B.** Schematic

385 pathway models for complete nitrification, and methane and C1 oxidation, based on enzyme complexes  
386 identified in the metagenome. ALDH, aldehyde dehydrogenase; AMO, ammonia monooxygenase;  
387 COX, cytochrome *c* oxidase; FDH, formate dehydrogenase; FOLD, methylenetetrahydrofolate  
388 dehydrogenase/cyclohydrolase; GSH, glutathione-linked formaldehyde oxidation; HAO,  
389 hydroxylamine dehydrogenase; H4MPT, tetrahydromethanopterin; HURM, hydroxylamine-  
390 ubiquinone redox module; pMMO, particulate methane monooxygenase; sMMO, soluble methane  
391 monooxygenase; MDH, lanthanide and calcium-dependent methanol dehydrogenases; NAR, nitrate  
392 reductase; NXR, nitrite oxidoreductase.

### 393 *Ammonia and nitrite oxidation*

394 16S rRNA gene sequence analysis revealed the presence of nitrifying bacteria affiliated with  
395 the families *Nitrospiraceae* and *Nitrosomonadaceae* in the DWTP Breehei. *Nitrospiraceae*  
396 dominated the nitrifying microbial community in all samples, but their abundance patterns  
397 differed along the different sampling locations, with the lowest abundance in P-RSF. In  
398 contrast, canonical ammonia-oxidizing bacteria (AOB) affiliated with the *Nitrosomonaceae*  
399 showed very low abundance in all samples (Figure S3). Metagenomic consensus binning  
400 allowed the recovery of five *Nitrospira* MAGs from WB and P-RSF and one MAG of an  
401 ammonia-oxidizing archaeum (AOA) affiliated with the genus *Nitrosoarchaeum*. Despite the  
402 detection of *Nitrosomonadaceae* in WB and S-RSF samples in 16S rRNA-based analyses, no  
403 high or medium-quality metagenomic bin of this taxonomic group was recovered.

404 All MAGs were screened for key genes of autotrophic nitrification, including the gene sets  
405 encoding ammonia monooxygenase (AMO) and nitrite oxidoreductase (NXR). The AMO  
406 complex catalyzes the oxidation of ammonia to hydroxylamine (Figure 3B) and belongs to the  
407 family of copper-containing membrane monooxygenases (CuMMOs or XMO) (Khadka et al.,  
408 2018). Based on the phylogeny of AMO subunit A (AmoA), comammox *Nitrospira* form two  
409 monophyletic clades referred to as clade A and B (Daims et al., 2015). AmoA is often used as  
410 a functional and phylogenetic marker for ammonia-oxidizing microorganisms (Junier et al.,  
411 2008; Pester et al., 2012; Pjevac et al., 2017) and thus AmoA was used to examine the full

412 ammonia oxidation potential in the DWTP Breehei. Phylogenetic analysis placed our  
 413 metagenome-derived AmoA sequences into five divergent groups (Figure 4A).

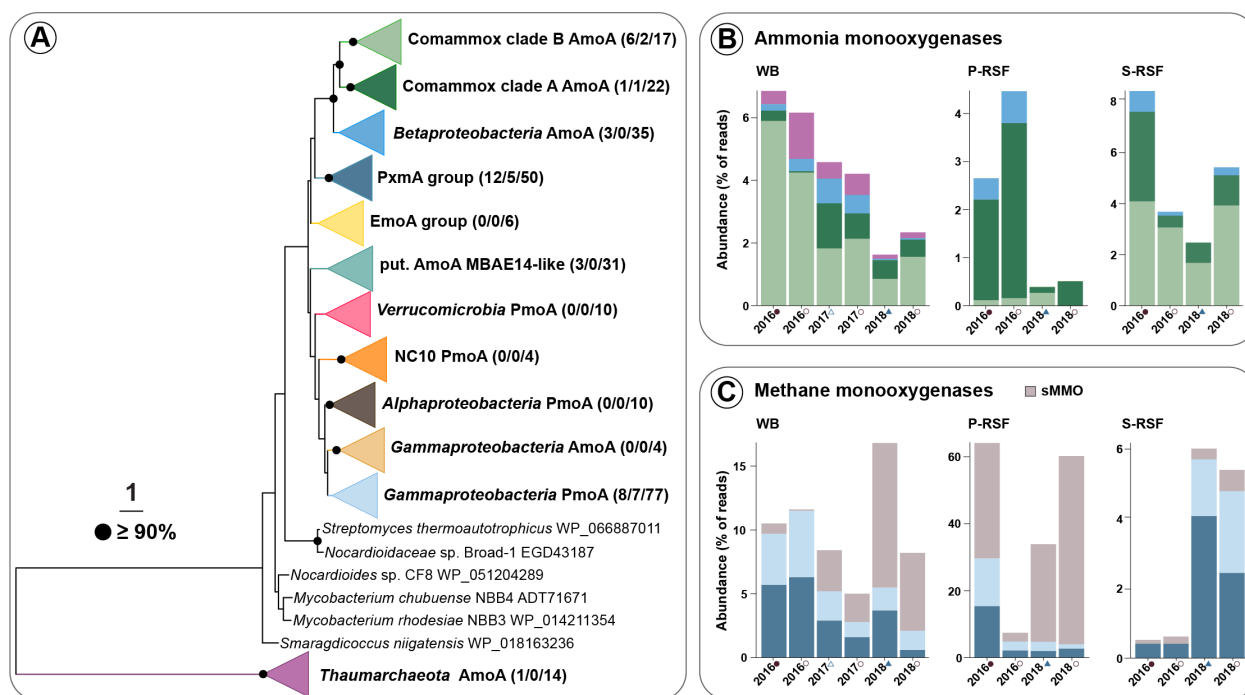

414  
 415 **Figure 4.** Diversity and abundance of ammonia and methane-oxidizing microorganisms in DWTP  
 416 Breehei. (A) Phylogenetic tree of CuMMO subunit A proteins recovered from the DWTP metagenomes  
 417 by gene-centric and genome-resolved approaches. Numbers in brackets indicate sequences per  
 418 metagenome, number of recovered MAGs, and references datasets for each clade, respectively. Amo,  
 419 ammonia monoxygenase; Emo, ethane monoxygenase; Pmo/Pxm, particulate methane  
 420 monoxygenase. Bootstrap support values  $\geq 90\%$  are indicated by black dots; the scale bar indicates  
 421 estimated amino acid substitutions. Normalized abundances of (B) ammonia and (C) methane oxidizers  
 422 are shown as proportion of the recovered ammonia and methane monoxygenases, respectively, to the  
 423 normalized *rpoB* abundance. The *mmoX* gene was used to calculate the abundance of sMMO-containing  
 424 methanotrophs; most *mmoX* reads were recruited by MAG P-RSF-NP-02 (70-100%). As most available  
 425 high-quality betaproteobacterial AOB genomes (n=17, comp.  $\geq 90\%$ , number of contigs <5) contain  
 426 between 2 and 3 *amoA* copies, and MAG P-RSF-NP-02 contained 4 *mmoX* copies, abundances of both  
 427 genes were normalized for gene copy numbers. Sample labels correspond to Figure 2.

428 Of the five *Nitrospira* MAGs recovered in this study, one (P-RSF-IL-20) contained *amoA*  
 429 genes affiliated with clade A, and two (WB-IL-04, WB-IL-16) with clade B (Figure 3A, Table  
 430 S3). In protein-based phylogenetic analyses, most of the clade A and B comammox AmoA  
 431 sequences most closely clustered with sequences derived from DWTP metagenomes (Figure

432 S4). Clade A comammox *amoA* genes were detected in all samples from the DWTP Breehei  
433 and were the most abundant *amoA* type in P-RSF (0.1-3.6%). In general, ammonia oxidizers  
434 were more abundant in 2016 samples than in 2018 (Figure 4B). The clade A comammox  
435 *Nitrospira* MAG (P-RSF-IL-20) had the highest coverage in the 2016 P-RSF sample extracted  
436 with the Blood & Tissue Kit, while this coverage decreased drastically with another DNA  
437 extraction method, indicating a strong extraction bias as discussed above (Table S2).  
438 Consequently, the average coverage of this MAG was higher in S-RSF than in P-RSF. In  
439 contrast, clade B comammox *amoA* recruited the largest number of reads in WB (0.8-5.9%)  
440 and S-RSF samples (1.7-4.1%; Figure 6A), but none of the two clade B-affiliated MAGs was  
441 detected in S-RSF, suggesting that not all clade B comammox *Nitrospira* genomes were  
442 recovered. The low abundance of clade B comammox *amoA* in P-RSF (Figure 4B) indicates  
443 an adaptation of clade B comammox *Nitrospira* to specific niches. In addition to complete  
444 nitrifiers, the genus *Nitrospira* also contains canonical nitrite-oxidizing bacteria (NOB) (Daims  
445 et al., 2016). Both canonical as well as comammox *Nitrospira* employ the NXR complex for  
446 the oxidation of nitrite to nitrate (Figure 3B). Except for one MAG (P-RSF-IL-22), all  
447 *Nitrospira* MAGs contained a *nxrAB* gene cluster encoding for the alpha and beta subunit of  
448 the NXR complex (Figure 3A, Table S3). MAG P-RSF-IL-22 was of medium quality (74.4%  
449 estimated completeness; Table 2) and did not contain any of the genes required for nitrification  
450 (Table S3). Consistent with previous studies (Palomo et al., 2019; Poghosyan et al., 2019),  
451 phylogenomic analysis using a concatenated alignment of 91 single-copy core genes showed  
452 that clade A and B comammox *Nitrospira* formed monophyletic clades within *Nitrospira*  
453 lineage II, and all *amoA*-containing MAGs were correctly affiliated with their respective  
454 comammox clade (Figure 5A).

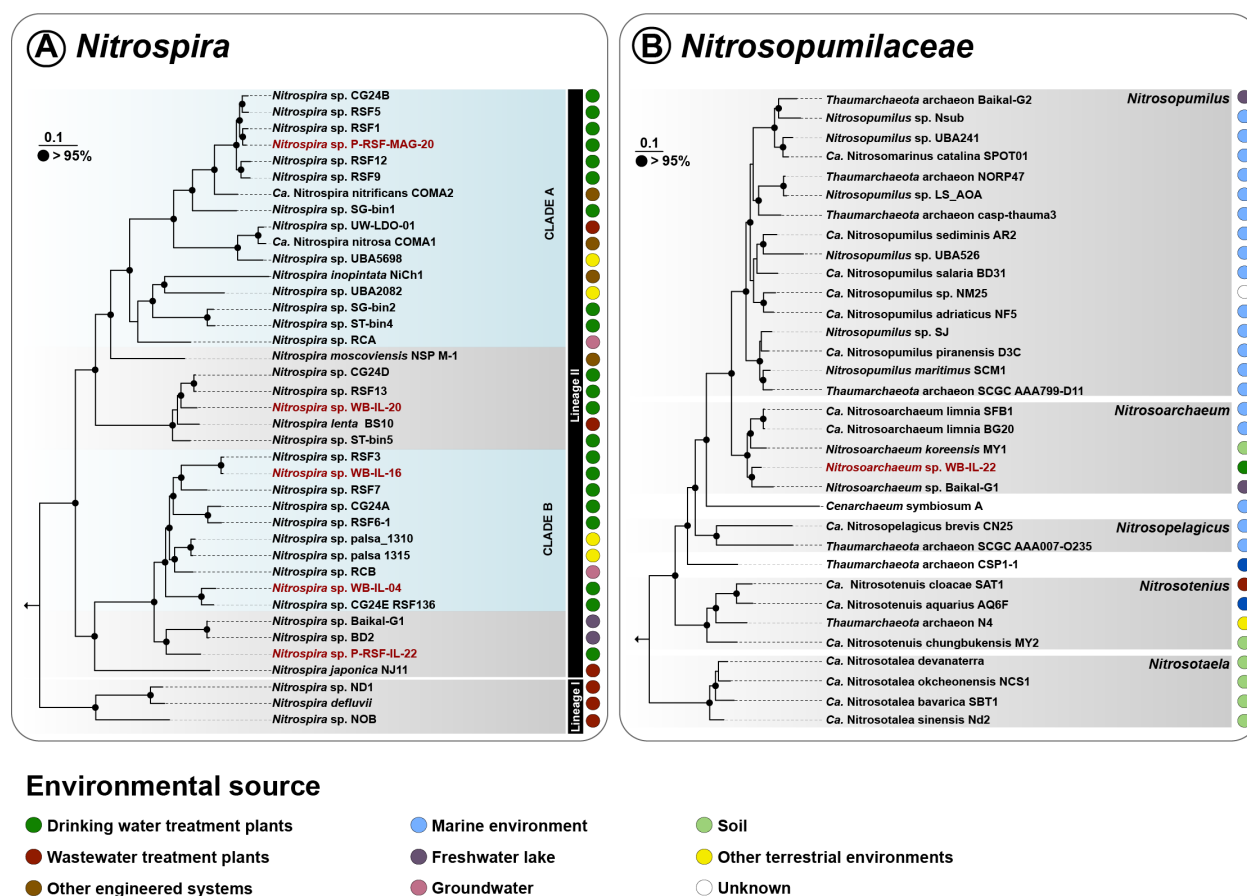

455

456 **Figure 5.** Maximum-likelihood phylogenomic analysis of **(A)** *Nitrospiraceae* based on 91 bacterial  
 457 single-copy core genes and **(B)** *Nitrosopumilaceae* based on 162 archaeal proteins. DWTP genomes  
 458 obtained in this study are shown in red. Bootstrap support values  $\geq 95\%$  are indicated by black dots; the  
 459 scale bars indicate estimated nucleotide **(A)** and amino acid **(B)** substitutions. The positions of the  
 460 outgroups are indicated by arrows. Environmental origins of the respective genomes are represented by  
 461 colored circles. Genome names correspond to NCBI RefSeq entries, while in **(B)** classifications at  
 462 higher taxonomic levels (gray shadings) are according to the GTDB database (Table S4). In **(A)**  
 463 *Nitrospira* sublineages are delineated by black bars, the comammox clades are highlighted by turquoise  
 464 shadings.

465 One MAG (WB-IL-22) affiliated with the genus *Nitrosoarchaeum* (AOA; Figure 5B) was  
 466 retrieved from the WB metagenome; however, it lacked an *amoA* sequence. Since a contig  
 467 (<1200 bp) containing a *Nitrosoarchaeum*-like *amoA* was identified in the metagenome, the  
 468 gene most likely is missing from MAG WB-IL-22 due to the size cutoff used during binning  
 469 (1500 bp). Consistent with gene-based analyses (0.1-1.7%; Figure 4B) the *Nitrosoarchaeum*  
 470 MAG was found solely in WB, where it accounted for merely  $\sim 0.2\%$  of all the assembled reads

471 in WB metagenomes (Figure 2, Table S2). The recovered archaeal AmoA sequences had high  
472 similarities to *Nitrosarchaeum koreense* and sequences derived from metagenomic analyses of  
473 diverse habitats (Figure S4). Betaproteobacterial *amoA* sequences of members of the genera  
474 *Nitrosomonas* and *Nitrospira* were identified in all samples, but were of low abundance. In  
475 addition to the characterized ammonia-oxidizing clades, recently the unclassified  
476 Gammaproteobacteria “MBAE14” genome was found to contain putative AMO genes (Mori  
477 et al., 2019). From the DWTP Breehei metagenomes, three putative AmoA sequences clustered  
478 in this novel sequence group despite low similarities to the putative enzyme of MBAE14  
479 (Figure 4A, S4).

480 The NXR belongs to the type II dimethyl sulfoxide (DMSO) reductase enzyme family (Lücker  
481 et al., 2010; Meincke et al., 1992), which also contains respiratory nitrate reductases (NARs)  
482 (Simon and Klotz, 2013). Consequently, many HMM profiling approaches fail to differentiate  
483 the two homologous groups. Therefore, a phylogenetic tree was constructed to classify the  
484 catalytic alpha subunits (NxrA/NarG) identified in the DWTP metagenomes (Figure 6).

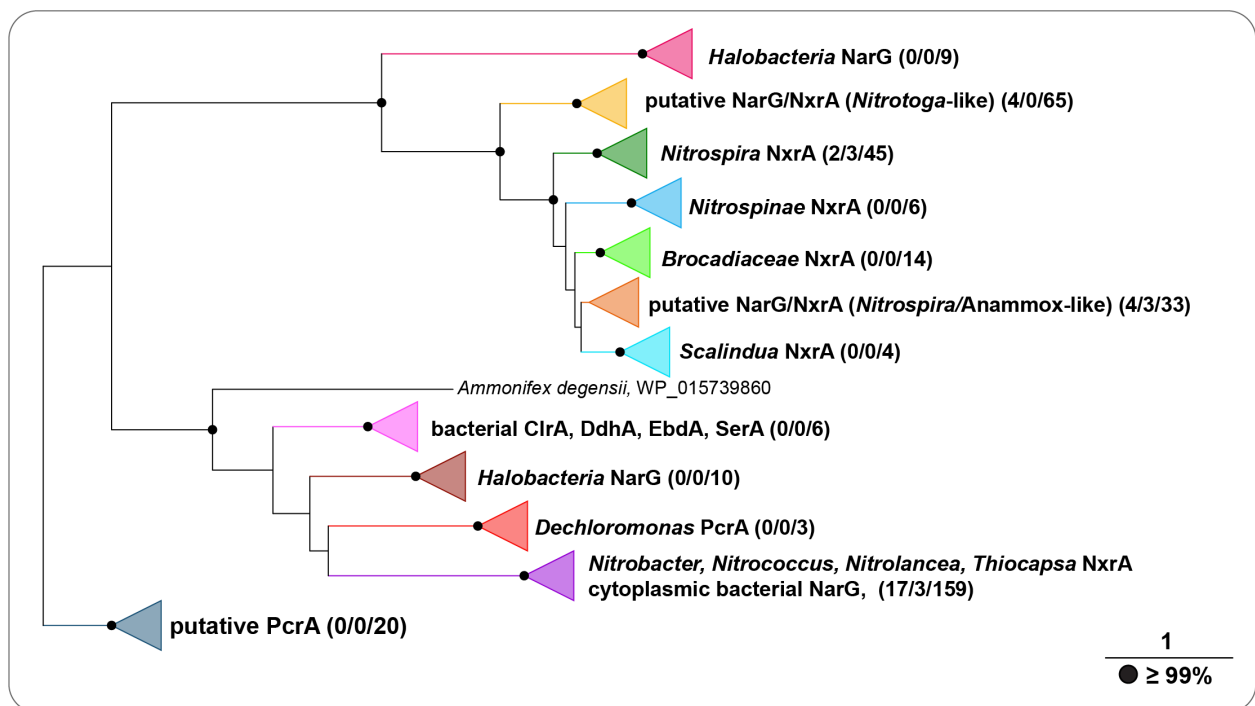

485



486 **Figure 6.** Phylogenetic analysis of NxrA/NarG sequences and related proteins. Numbers in brackets  
487 indicate sequences per from DWTP Breehei metagenome, recovered MAGs and reference sequences  
488 used for each group. Clr, chlorate reductase; Ddh, dimethylsulfide dehydrogenase; Ebd, ethylbenzene  
489 dehydrogenase; Nar, nitrate reductases; Nxr, nitrite oxidoreductase; Pcr, perchlorate reductase; Ser,  
490 selenate reductase. Bootstrap support values  $\geq 99\%$  are indicated by black dots; the scale bar indicates  
491 estimated amino acid substitutions.

492 Besides the *Nitrospira* genomes, six additional MAGs contained NXR/NAR gene clusters  
493 (Figure 3A). Phylogenetic analysis revealed that the sequences derived from  
494 alphaproteobacterial MAGs (P-RSF-IL-15, P-RSF-IL-21, S-RSF-IL-04) were closely affiliated  
495 with NarG sequences of known nitrate reducers (Figure S5). The sequences from a MAG  
496 affiliated with the *Pedosphaeraceae* (WB-IL-17) and two *Planctomycetota* MAGs (WB-IL-  
497 13, S-RSF-IL-06) shared low similarities with known NXRs, but clustered with *Nitrospira*,  
498 *Nitrospina* and anammox bacteria (Figure S5). While the catalytic NxrA subunit of WB-IL-13  
499 contains one Fe-S domain typical for DMSO reductase family molybdoproteins (Lücker et al.,  
500 2010), this binding motif for Fe-S clusters is absent from the WB-IL-17 and S-RSF-IL-04  
501 NXR-like proteins. Similar to other periplasmic NXRs (Lücker et al., 2013; Lücker et al., 2010;  
502 Spieck et al., 1998), these putative NXRs contain N-terminal twin-arginine motifs for protein  
503 translocation into the periplasmic space. Putative genes encoding the NXR gamma subunit  
504 (*nxC*) were found to be co-localized with *nxA* in the WB-IL-13 and WB-IL-17 MAGs.  
505 Similar to *Nitrospina gracilis* (Lücker et al., 2013) and “*Ca. Nitrotoga fabula*” (Kitzinger et  
506 al., 2018), these putative NxCs contain N-terminal signal peptides necessary for translocation  
507 via the Sec pathway. The *Pedosphaeraceae* (WB-IL-17) and one of the *Planctomycetota*  
508 MAGs that affiliated with the *Phycisphaerales* (WB-IL-13) were present in WB samples, but  
509 of low abundance (Figure 2, Table S1). The second, unclassified *Planctomycetota* MAG (S-  
510 RSF-IL-06) was detected only in S-RSF and accounted for 0.5-2% of all assembled reads in  
511 the S-RSF metagenomes (Table S1). Additionally, some of the metagenome-derived

512 NXR/NAR sequences were placed into the clade containing the novel NXR type of “*Ca.*  
513 *Nitrotoga fabula*” (Figure S4B) (Kitzinger et al., 2018).

#### 514 *Methane and one-carbon metabolism*

515 Taxonomic profiling of the extracted 16S rRNA genes (Figure S3) identified  
516 *Gammaproteobacteria* as the most dominant taxa in WB (40-55%) and P-RSF (61-67%)  
517 samples. On the family level, *Methylomonadaceae* and *Methylophilaceae* formed the most  
518 abundant groups in WB and P-RSF (Figure S3B). In total, 14 MAGs belonging to these two  
519 phylogenetic groups were recovered, which were mainly present in WB and P-RSF samples  
520 (Figure 2).

521 Phylogenomic analysis of the 14 *Methylomonadaceae* and *Methylophilaceae*-affiliated MAGs  
522 using a concatenated alignment of 92 single-copy core genes showed that three of the seven  
523 *Methylomonadaceae* MAGs were affiliated with the genus *Methyloglobulus* (Figure 7A). Of  
524 the remaining MAGs, two (P-RSF-IL-13 and WB-IL-06) were distantly related to  
525 *Methylobacter* and one (WB-IL-19) to *Crenothrix*, while P-RSF-IL-24 clustered separately  
526 from the known genera within this family (Figure 7A). Six out of seven *Methylophilaceae*  
527 MAGs were affiliated with the genus *Methylotenera*, whereas P-RSF-NP-02 formed a separate  
528 branch within the *Methylophilaceae* family (Figure 7B).



543 closest described relative of P-RSF-NP-02 (95.7% sequence identity). This value is below the  
544 similarity cutoff for species delineation (Stackebrandt and Ebers, 2006), which, in combination  
545 with the distinct clustering in the phylogenomic analysis (Figure 7B), indicates that P-RSF-  
546 NP-02 probably belongs to a novel genus within the family *Methylophilaceae*. The estimated  
547 genomic average nucleotide identity value (ANI; 77.26%) also indicated a novel species  
548 distinct from “*Ca. M. turicensis*”. The Breehei DWTP metagenomes and the recovered MAGs  
549 furthermore were screened for genes encoding the soluble (sMMO) or particulate (pMMO)  
550 methane monooxygenases (Table S3). Notably, a complete operon encoding sMMO  
551 (*mmoXIX2YBZDC*) was identified in the highly-covered *Methylophilaceae* MAG P-RSF-NP-  
552 02 (Figure 3, Table S3). This was surprising as no previously described member of the family  
553 *Methylophilaceae* contains any methane monooxygenase (Salcher et al., 2019). P-RSF-NP-02  
554 also harbors two additional copies of the *mmoX* gene encoding the alpha subunit of the sMMO  
555 (Table S3). The two orphan *mmoX* copies share high sequence identities on amino acid level  
556 with the operonal *mmoX1* (99.8-100%), while *mmoX2* has ~97% identity to *mmoX1* and the  
557 two orphan *mmoX*. A BLAST search against the NCBI RefSeq database identified that the  
558 MmoX copies of P-RSF-NP-02 share 83-84% similarity with the *Methylomicrobium*  
559 *buryatense* proteins (Kaluzhnaya et al., 2001). The abundance of methanotrophs in the total  
560 community was estimated based on *pmoA*, *pxmA* and *mmoX* gene coverages (Figure 4C). The  
561 sMMO-containing methanotrophs were present at high abundances in the 2018 WB (6-11%)  
562 and P-RSF (2.5-56%) samples (Figure 4C), where MAG P-RSF-NP-02 also dominated the  
563 total microbial communities (Figure 2). Other samples were dominated by pMMO containing  
564 bacteria (Figure 4C.) The gene cluster encoding the structural pMMO subunits (*pmoCAB*) was  
565 identified in all *Methylomonadaceae* genomes. Furthermore, five MAGs also harbor the highly  
566 divergent *pxmABC* gene cluster encoding for pXMO (Figure 3) (Tavormina et al., 2011).  
567 Phylogenetic analysis of the pMMO alpha subunits (PmoA/PxmA) revealed that all sequences

568 recovered in this study, including the metagenome-derived ones, were affiliated with  
569 gammaproteobacterial methanotrophs (Figure S4). Besides pMMO, the three  
570 *Methylomonadaceae* MAGs (WB-IL-19, P-RSF-IL-13, P-RSF-IL-24) also possess sMMO  
571 (Figure 3, Table S3).

572 In both methanotrophs and non-methanotrophic methylotrophs, methanol oxidation to  
573 formaldehyde is catalyzed by pyrroloquinoline quinone-dependent (PQQ) methanol  
574 dehydrogenases (MDH) (Keltjens et al., 2014). In this study, the rare earth element-dependent  
575 MDH (Ln-MDH) was detected in all *Methylomonadaceae* and *Methylophilaceae*, in one  
576 *Deltaproteobacteria* (S-RSF-IL-11), and one *Hyphomicrobium* (P-RSF-NP-07) MAGs. In  
577 contrast, the calcium-dependent MDH (Ca-MDH) was found only in some MAGs (Figure 3A,  
578 Table S2). Thus, all analyzed methanotrophs and methylotrophs can oxidize methanol either  
579 to formaldehyde by Ca-MDH, or directly to formate by Ln-MDH (Figure 3B) (Pol et al., 2014).  
580 Four formaldehyde-oxidizing pathways were identified, including oxidation by single  
581 aldehyde dehydrogenases, as well as via tetrahydromethanopterin (H<sub>4</sub>MPT), tetrahydrofolate  
582 (H<sub>4</sub>F), or glutathione (GSH)-linked pathways (Figure 3). All the MAGs contained formate  
583 dehydrogenases (FDHs), necessary for the oxidation of formate to carbon dioxide.

## 584 **Discussion**

### 585 DWTP microbiome

586 The DWTP Breehei microbiome was followed over a time period of three years and  
587 characterized using genome-resolved and gene-centric metagenomic approaches. The  
588 microbial community structure was studied for the filter material of two sequential rapid sand  
589 filters and the biofilm formed on the walls of the primary sand filter (Figure 1). Similar to some  
590 Danish DWTPs (Gülay et al., 2016), the location within the DWTP had a strong influence on  
591 the microbial community composition. In total, 56 dereplicated near-complete MAGs were

592 recovered, comprising 23, 64, and 14% of the total assembled reads for WB, P-RSF, and S-  
593 RSF respectively (Table S1). These MAGs expand our knowledge on the genomic inventory  
594 of the main microorganisms involved in contaminant removal from groundwater to produce  
595 drinking water. The assembly statistics also indicate that the obtained metagenomic  
596 information especially for WB and S-RSF only covers a part of the diversity. In general, the  
597 genome-centric approach is a powerful tool to analyze the functional potential of an  
598 environmental sample based on recovered MAGs. However, due to low abundance or strain  
599 diversity, it often is difficult to obtain good-quality genomes for many microorganisms  
600 (Sczyrba et al., 2017). Thus, to examine full ammonia and methane oxidation potential, we  
601 also used a gene-centric approach (see below).

602 In groundwater, iron exists in the ferrous [Fe(II)] and ferric [Fe(III)] state (Chapelle, 2001) and  
603 its oxidation can cause severe operational problems during drinking water production,  
604 including bad taste, discoloration, staining, deposition in distribution systems leading to  
605 aftergrowth and incidences of high turbidity (Emerson and De Vet, 2015; Sharma et al., 2005).  
606 Water quality monitoring at the DWTP Breehei over 16 years indicates 99% iron removal  
607 efficiency (Table 1). Under oxic conditions and circumneutral pH, iron oxidation occurs both  
608 chemically and biologically in these systems (Tekerlekopoulou et al., 2006). Biological iron  
609 oxidation is mediated by chemolithoautotrophic microorganisms that obtain energy from  
610 oxidizing ferrous iron (Emerson and De Vet, 2015). However, the absence of an universal  
611 metabolic pathway for iron oxidation makes it challenging to identify iron-oxidizing bacteria  
612 (Emerson and De Vet, 2015). Here, we obtained four MAGs classified as *Gallionella* and  
613 *Sideroxydans* species (Figure 2), which are generally regarded as iron-oxidizing bacteria  
614 (Bruun et al., 2010; de Vet et al., 2011; Druschel et al., 2008). These microorganisms were  
615 found in WB and P-RSF (Figure 2), where the iron load was high (Table 1). It thus can be

616 assumed that *Gallionellaceae* members are the main drivers of biological iron oxidation in this  
617 DWTP.

618 The presence of reduced sulfur compounds such as H<sub>2</sub>S, methanethiol, and dimethyl sulfide in  
619 anoxic groundwater adds yet another level of complexity to the system (Emerson and De Vet,  
620 2015; Sercu et al., 2005). These compounds serve as electron donors for sulfur-oxidizing  
621 microorganisms. For sulfide oxidation, sulfide:quinone oxidoreductases (SQR) as well as  
622 flavocytochrome *c* sulfide dehydrogenases (FCC) were detected in many of the recovered  
623 MAGs (Table S3). However, as sulfide reacts with cytochromes, heme proteins, and other iron-  
624 containing compounds, these enzymes are used for detoxification by many bacteria (Cherney  
625 et al., 2010; Marcia et al., 2009; Shahak and Hauska, 2008; Zhang et al., 2013). The MAGs  
626 WB-IL-01 and P-RSF-IL-21, classified as *Sulfuriferulla* and *Hyphomicrobium*, respectively,  
627 contained the heterodisulfide reductase (HdrCBAHypHdrCB) and sulfur oxidation  
628 (SoxXYZAB) enzyme complexes, as well as sulfite oxidase (SoeABC; Table S3). The Sox-  
629 Hdr-Soe system is a novel pathway found in some chemolithoautotrophic sulfur-oxidizing  
630 bacteria and is involved in volatile organosulfur and inorganic sulfur compound degradation  
631 (Koch and Dahl, 2018; Watanabe et al., 2019), and also earlier studies provided evidence that  
632 the Hdr complex is involved in sulfur oxidation (Boughanemi et al., 2016; Quatrini et al.,  
633 2009). Furthermore, recently it has also been shown in *Hyphomicrobium* that the Hdr complex  
634 is essential for oxidation of thiosulfate to sulfate (Koch and Dahl, 2018). The Sox-Hdr-Soe  
635 system is found in many *Sulfuriferulla* genomes and SoeABC are suggested to be crucial in  
636 sulfur oxidizers that lack SoxCD (Watanabe et al., 2019).

637 Some microbial groups, including *Chloroflexota*, *Acidobacteriota*, *Bacteroidota*, and  
638 *Myxococcota*, which are originating from groundwater habitats (Griebler and Lueders, 2009;  
639 Wegner et al., 2019) are also frequently identified in DWTPs (Albers et al., 2015; Gülay et al.,  
640 2016; Palomo et al., 2016). However, we have limited knowledge about their potential role in

641 drinking water treatment. Four MAGs affiliated with *Acidobacteriota* were dominating the  
642 microbial community in S-RSF (Figure 2, Figure S3). *Acidobacteriota* are often found in soil  
643 under substrate-limited conditions (Hartmann et al., 2015; Jones et al., 2009; Navarrete et al.,  
644 2015; Ward et al., 2009). As discussed by Palomo and colleagues (Palomo et al., 2016),  
645 *Acidobacteriota* may be involved in carbon cycling in DWTPs. Members of the candidate  
646 phyla radiation (CPR) (Brown et al., 2015; Hug et al., 2016) were found only in WB samples  
647 (Figure S3). CPR members constitute a substantial fraction of the bacterial diversity (Castelle  
648 et al., 2018) and are widely distributed in many environments, including groundwater (Brown  
649 et al., 2015; Herrmann et al., 2019; Wegner et al., 2019; Yan et al., 2020) and DWTPs  
650 (Bautista-de los Santos et al., 2016; Bruno et al., 2017). One MAG affiliated with “*Ca.*  
651 *Gracilibacteria*” (WB-IL\_23) was highly abundant in the WB2018 sample (1-4% of assembled  
652 reads) and might have the ability to adapt and survive under low nutrient conditions (Wegner  
653 et al., 2019). In groundwater, *Acidobacteriota* and CPR bacteria often co-occur with  
654 autotrophic microorganisms (Herrmann et al., 2019). Similar to interactions of nitrifying and  
655 heterotrophic bacteria in activated sludge (Okabe et al., 2005), the organic compounds  
656 produced by autotrophic bacteria may serve as substrates for *Acidobacteriota* and “*Ca.*  
657 *Gracilibacteria*” in DWTPs.

#### 658 *Ammonia and nitrite metabolism*

659 The removal of ammonium and nitrite is a vital step in drinking water treatment. Although the  
660 drinking water produced in DWTP Breehei is of high quality and free of any nitrogen  
661 compounds, intermediate nitrite accumulation is observed in the effluent of the P-RSF, which  
662 can be caused by incomplete nitrification (de Vet et al., 2012; Wagner et al., 2016). Thus,  
663 profound insights into the microbial key players and their metabolic capabilities and limitations  
664 are crucial for optimizing and stabilizing N removal in these systems. The genomic potential  
665 for nitrification was mainly identified in MAGs affiliated with the genus *Nitrospira*, which



666 however did not display as high abundances as observed in other DWTP systems (Albers et  
667 al., 2015; Gülay et al., 2016; Palomo et al., 2016). Comammox *Nitrospira* were the most  
668 abundant nitrifying guild in all DWTP Breehei samples (Figure 4B), corroborating previous  
669 findings of *Nitrospira* dominating the nitrifying microbial community in DWTPs (Albers et  
670 al., 2015; Gülay et al., 2016). Until recently, the dominance of this group was puzzling since  
671 *Nitrospira* were always regarded as strict nitrite-oxidizing bacteria. By now, this imbalance in  
672 abundance of *Nitrospira* and canonical AOB can be explained by the presence of complete  
673 nitrifying *Nitrospira* in many sand filtration systems (Palomo et al., 2018; Pinto et al., 2015;  
674 Wang et al., 2017). Notably, complete nitrifiers are the most abundant nitrifying group in  
675 several Danish RSFs (Fowler et al., 2018) and were identified as key drivers of ammonia and  
676 nitrite oxidation in these systems (Gülay et al., 2019). Consistent with these previous results,  
677 comammox *Nitrospira* also apparently outcompeted canonical AOB and AOA in DWTP  
678 Breehei. Comammox clade A was found to dominate in P-RSF samples and clade B in WB  
679 and S-RSF (Figure 4B). Thus, sampling location substantially influenced the abundance of the  
680 two comammox clades, indicating potential niche partitioning between them. The habitat  
681 preferences by different nitrifiers might be explained by their ammonia oxidation kinetics and  
682 substrate affinities (Kits et al., 2017; Martens-Habbena et al., 2009; Prosser and Nicol, 2012).  
683 Based on the kinetic theory of optimal pathway length (Costa et al., 2006) and physiological  
684 analyses of *N. inopinata* (Kits et al., 2017), comammox *Nitrospira* are K-strategists that have  
685 a competitive advantage in environments with very low ammonium fluxes. However, since no  
686 comammox clade B enrichment culture is currently available, we can only speculate about the  
687 niche defining metabolic capabilities of this group. A recent study reported that nitrification  
688 activity in forest and paddy soils when subjected to ammonium limitation is associated with  
689 clade B rather than clade A comammox *Nitrospira* (Wang et al., 2019). Comammox clade B  
690 appeared to dominate also in forest soil under increasing nitrogen load and decreasing pH (Shi

691 et al., 2018). Under acidic conditions, ammonia ( $\text{NH}_3$ ) is increasingly protonated to ammonium  
692 ( $\text{NH}_4^+$ ), resulting in extremely low concentrations of bioavailable ammonia, the substrate of  
693 AMO. Correspondingly, also in Danish RSFs with influent ammonium concentrations ranging  
694 from 0.01-0.53 mg-N/L, clade B constituted up to 75% of the total comammox *Nitrospira*  
695 population (Fowler et al., 2018). The higher abundance of clade B comammox *Nitrospira* in  
696 S-RSF compared to P-RSF observed here also suggests their adaptation to ammonium-depleted  
697 environments. These results indicate that clade B comammox *Nitrospira* may exhibit an even  
698 lower half-saturation constant ( $K_s$ ) and higher substrate affinities than clade A species and  
699 thrive at extremely low ammonium concentrations. However, it will be required to obtain clade  
700 B comammox *Nitrospira* in culture to ascertain the physiology of these enigmatic bacteria.

701 In addition to comammox *Nitrospira*, also two canonical *Nitrospira* MAGs were retrieved from  
702 the Breehei DWTP metagenomes, indicating that these nitrite oxidizers can interact with  
703 canonical ammonia oxidizers as well as with complete nitrifiers. Moreover, we identified  
704 MAGs affiliated with the *Verrucomicrobiota* and *Planctomycetota* phyla (Figure 3) that  
705 contained NXR-like sequences with similarity to the enzymes of known NOBs. In phylogenetic  
706 analyses of NxrA, they clustered with *Nitrospira*, *Nitrospina*, and anammox bacteria (Figure  
707 S4B). The apparent periplasmic orientation of the NxrA and the lack of transmembrane helices  
708 in the NxrC subunit suggests that the NXR of these putative NOBs may be soluble, as has also  
709 been proposed for *Nitrospina gracilis* (Lücker et al., 2013) and “*Ca. Nitrotoga fabula*”  
710 (Kitzinger et al., 2018). However, further studies are needed to analyze the potential nitrite-  
711 oxidizing capacity of these bacteria. Although in a very low abundances, *Nitrobacter* species  
712 are also detected in some RSFs (Tatari et al., 2017), which we however did not observe in  
713 DWTP Breehei.

714 *Methane and one-carbon metabolism*

715 In DWTPs, methane stripping via aeration is preferred over bacterial methane oxidation since  
716 microbial activity and growth cause accumulation of extracellular polymeric substances that  
717 lead to clogging of the biofilter material (Streese and Stegmann, 2003). However, both WB  
718 and P-RSF samples showed high methane-oxidizing capacity (Figure S1). Especially the wall  
719 biofilm might counteract methane blowout by oxidizing methane before it leaves the filter and  
720 thus reduce methane emissions to the atmosphere. In the global carbon cycle, methane-  
721 oxidizing microorganisms play a significant role (Cicerone and Oremland, 1988) as they  
722 represent the only known biological methane sink (Aronson et al., 2013). These organisms are  
723 able to grow with methane as sole carbon and energy source. The first step of methane  
724 oxidation, methane activation and conversion to methanol, is catalyzed either by soluble  
725 (sMMO) or particulate (pMMO) methane monooxygenases (Tavormina et al., 2011; Trotsenko  
726 and Murrell, 2008). Especially the sMMP is not universal to methanotrophs and only certain  
727 phylogenetic groups are known to encode this methane monooxygenase type (Verbeke et al.,  
728 2019), usually together with pMMO.

729 Several studies have shown that the majority of the methane-oxidizing bacteria colonizing the  
730 granular material of RSFs are affiliated with the gammaproteobacterial *Methylococcaceae*  
731 family (Albers et al., 2015; Gülay et al., 2016; Palomo et al., 2016). Recently, this family was  
732 reclassified and split into the *Methylomonadaceae*, *Methylococcaceae*, and  
733 *Methylothermaceae* (Parks et al., 2017). Especially members of the *Methylomonadaceae* have  
734 been found in many natural and engineered systems (Flynn et al., 2016; Hoefman et al., 2014;  
735 Kalyuzhnaya et al., 2015; Kits et al., 2013; Ogiso et al., 2012; Oswald et al., 2017; Parks et al.,  
736 2017; Svenning et al., 2011). In this study, all recovered *Methylomonadaceae* MAGs contained  
737 pMMO, and some of them additionally encoded sMMO (Figure 3, Table S2). In addition,  
738 several methanotrophic MAGs also contained the highly divergent pXMO enzyme complex

739 encoded by the *pxmABC* gene cluster (Tavormina et al., 2011). Previous studies have shown  
740 that pXMO is involved in methane oxidation under hypoxic denitrifying conditions in  
741 *Methylomonadaceae* strains (Kits et al., 2015a; Kits et al., 2015b), but its exact function in the  
742 sand filters remains to be determined.

743 Methane oxidation results in the production of various C1 intermediates including methanol  
744 and formate, which can be used as substrates by methylotrophic bacteria. In DWTP Breehei,  
745 the P-RSF samples were dominated by members of the *Methylophilaceae* family, which was  
746 assumed to accommodate only methylotrophic bacteria incapable of growth on methane.  
747 Surprisingly, one of the *Methylophilaceae* MAGs (P-RSF-NP-02) harbored a complete gene  
748 operon encoding a sMMO (Figure 3, Table S2), indicating a methanotrophic potential. This  
749 finding is substantiated by an earlier study, which demonstrated that a member of  
750 methylotrophic genus *Methyloceanibacter* can become methanotrophic by acquiring sMMO  
751 (Vekeman et al., 2016). The phylogenomic analysis and low ANI value to other members of  
752 this family (77.26%) suggest that P-RSF-NP-02 represents a novel species within the  
753 *Methylophilaceae* (Figure 7B) and the extremely high coverage of this MAG indicates a major  
754 role in methane removal in the DWTP Breehei. The high abundance of this potential new novel  
755 methane-oxidizing bacterium in the P-RSF will be facilitated by the high iron content of the  
756 influent water, as the sMMO contains a diiron cluster in the active site (Jasniewski and Que,  
757 2018; Wallar and Lipscomb, 1996).

## 758 **Conclusions**

- 759 • The metagenomic analyses enabled us to identify key microbial populations involved  
760 in the removal of ammonium and methane. The location within the DWTP Breehei was  
761 the most influential factor shaping the microbial community.

- 762       • Clade A comammox *Nitrospira* dominated the nitrifying microbial community in P-  
763       RSF, while clade B was most abundant in S-RSF where ammonium concentrations are  
764       the lowest and, in the biofilm (WB), which is a predicted niche for comammox bacteria.  
765       • The methanotrophic community was dominated by sMMO-containing bacteria,  
766       particularly by one novel *Methylophilaceae* member, which might be facilitated by a  
767       high iron concentration in the groundwater.

### 768   **Competing interests**

769   The authors declare that they have no competing interests.

### 770   **Author contributions**

771   LP and HOdC collected and processed samples. LP and HK analyzed and interpreted the data.  
772   JF and GC contributed to bioinformatics analyses. TvA and GC performed Illumina and  
773   Nanopore sequencing. HOdC, MJ and MAHJvK were involved in project discussion and data  
774   interpretation. SL conceived the research project. LP, HK, and SL wrote the manuscript with  
775   input from all the authors.

### 776   **Data availability**

777   The genome sequences of the 56 MAGs recovered in this study and the raw sequencing data  
778   have been deposited in GenBank under BioProject number PRJNA622654.

### 779   **Acknowledgments**

780   We would like to thank Weren de Vet, Geert Gielens and Kay Bouts for providing necessary  
781   information about DWTP Breehei performance and sampling assistance, and Linnea Kop for  
782   fruitful discussions. Financial support was provided by the Netherlands Organization for

783 Scientific Research (NWO Talent Programme grants VI.Veni.192.086, 016.Veni.192.062 and  
784 016.Vidi.189.050, and Gravitation grants 024.002.001 [NESSC] and 024.002.002 [SIAM]) and  
785 the European Research Council (ERC Advanced Grants 339880 [Ecomom] and 669371  
786 [VOLCANO]).

## 787 **References**

788 Albers, C.N., Ellegaard-Jensen, L., Harder, C.B., Rosendahl, S., Knudsen, B.E., Ekelund, F.  
789 and Aamand, J. 2015. Groundwater Chemistry Determines the Prokaryotic Community  
790 Structure of Waterworks Sand Filters. *Environ Sci Technol* 49(2), 839-846.

791 Alneberg, J., Bjarnason, B.S., de Bruijn, I., Schirmer, M., Quick, J., Ijaz, U.Z., Lahti, L.,  
792 Loman, N.J., Andersson, A.F. and Quince, C. 2014. Binning metagenomic contigs by  
793 coverage and composition. *Nat Methods* 11(11), 1144-1146.

794 Armenteros, J.J.A., Tsirigos, K.D., Sonderby, C.K., Petersen, T.N., Winther, O., Brunak, S.,  
795 von Heijne, G. and Nielsen, H. 2019. SignalP 5.0 improves signal peptide predictions  
796 using deep neural networks. *Nat Biotechnol* 37(4), 420-423.

797 Aronson, E.L., Allison, S.D. and Helliker, B.R. 2013. Environmental impacts on the diversity  
798 of methane-cycling microbes and their resultant function. *Front Microbiol* (4:225).

799 Bautista-de los Santos, Q.M., Schroeder, J.L., Sevillano-Rivera, M.C., Sungthong, R., Ijaz,  
800 U.Z., Sloan, W.T. and Pinto, A.J. 2016. Emerging investigators series: microbial  
801 communities in full-scale drinking water distribution systems - a meta-analysis. *Environ*  
802 *Sci-Wat Res Technol* 2(4), 631-644.

803 Beech, W.B. and Sunner, J. 2004. Biocorrosion: towards understanding interactions between  
804 biofilms and metals. *Curr Opin Biotechnol* 15(3), 181-186.

805 Boughanemi, S., Lyonnet, J., Infossi, P., Bauzan, M., Kosta, A., Lignon, S., Giudici-Orticoni,  
806 M.T. and Guiral, M. 2016. Microbial oxidative sulfur metabolism: biochemical evidence  
807 of the membrane-bound heterodisulfide reductase-like complex of the bacterium *Aquifex*  
808 *aeolicus*. *FEMS Microbiol Lett* 363(15).

809 Bowers, R.M., Kyrpides, N.C., Stepanauskas, R., Harmon-Smith, M., Doud, D., Reddy,  
810 T.B.K., Schulz, F., Jarett, J., Rivers, A.R., Eloie-Fadrosch, E.A., Tringe, S.G., Ivanova, N.N.,  
811 Copeland, A., Clum, A., Becraft, E.D., Malmstrom, R.R., Birren, B., Podar, M., Bork, P.,

- 812 Weinstock, G.M., Garrity, G.M., Dodsworth, J.A., Yooseph, S., Sutton, G., Glockner, F.O.,  
813 Gilbert, J.A., Nelson, W.C., Hallam, S.J., Jungbluth, S.P., Etema, T.J.G., Tighe, S.,  
814 Konstantinidis, K.T., Liu, W.T., Baker, B.J., Rattei, T., Eisen, J.A., Hedlund, B.,  
815 McMahon, K.D., Fierer, N., Knight, R., Finn, R., Cochrane, G., Karsch-Mizrachi, I., Tyson,  
816 G.W., Rinke, C., Lapidus, A., Meyer, F., Yilmaz, P., Parks, D.H., Eren, A.M., Schriml, L.,  
817 Banfield, J.F., Hugenholtz, P., Woyke, T. and Genome Stand, C. 2017. Minimum  
818 information about a single amplified genome (MISAG) and a metagenome-assembled  
819 genome (MIMAG) of bacteria and archaea. *Nat Biotechnol* 35(8), 725-731.
- 820 Brown, C.T., Hug, L.A., Thomas, B.C., Sharon, I., Castelle, C.J., Singh, A., Wilkins, M.J.,  
821 Wrighton, K.C., Williams, K.H. and Banfield, J.F. 2015. Unusual biology across a group  
822 comprising more than 15% of domain Bacteria. *Nature* 523(7559), 208-211.
- 823 Bruno, A., Sandionigi, A., Rizzi, E., Bernasconi, M., Vicario, S., Galimberti, A., Cocuzza, C.,  
824 Labra, M. and Casiraghi, M. 2017. Exploring the under-investigated "microbial dark  
825 matter" of drinking water treatment plants. *Sci Rep* 7, 44350.
- 826 Bruun, A.M., Finster, K., Gunnlaugsson, H.P., Nornberg, P. and Friedrich, M.W. 2010. A  
827 Comprehensive Investigation on Iron Cycling in a Freshwater Seep Including Microscopy,  
828 Cultivation and Molecular Community Analysis. *Geomicrobiol J* 27(1), 15-34.
- 829 Campbell, J.H., O'Donoghue, P., Campbell, A.G., Schwientek, P., Sczyrba, A., Woyke, T.,  
830 Soll, D. and Podar, M. 2013. UGA is an additional glycine codon in uncultured SR1  
831 bacteria from the human microbiota. *Proc Natl Acad Sci USA* 110(14), 5540-5545.
- 832 Camper, A.K. 2004. Involvement of humic substances in regrowth. *Int J Food Microbiol*  
833 92(3), 355-364.
- 834 Castelle, C.J., Brown, C.T., Anantharaman, K., Probst, A.J., Huang, R.H. and Banfield, J.F.  
835 2018. Biosynthetic capacity, metabolic variety and unusual biology in the CPR and  
836 DPANN radiations. *Nat Rev Microbiol* 16(10), 629-645.
- 837 Chapelle, F.H. (2001) *Ground-water Microbiology and Geochemistry*, John Wiley & Sons,  
838 New York.
- 839 Cherney, M.M., Zhang, Y.F., Solomonson, M., Weiner, J.H. and James, M.N.G. 2010. Crystal  
840 Structure of Sulfide:Quinone Oxidoreductase from *Acidithiobacillus ferrooxidans*: Insights  
841 into Sulfidotrophic Respiration and Detoxification. *J Mol Biol* 398(2), 292-305.

- 842 Cicerone, R.J. and Oremland, R.S. 1988. Biogeochemical aspects of atmospheric methane.  
843 *Global Biogeochem Cycles* 2(4), 299-327.
- 844 Costa, E., Pérez, J. and Kreft, J.U. 2006. Why is metabolic labour divided in nitrification?  
845 *Trends Microbiol.* 14(5), 213-219.
- 846 de Vet, W., Dinkla, I.J.T., Rietveld, L.C. and van Loosdrecht, M.C.M. 2011. Biological iron  
847 oxidation by *Gallionella* spp. in drinking water production under fully aerated conditions.  
848 *Water Res* 45(17), 5389-5398.
- 849 de Vet, W., van Loosdrecht, M.C.M. and Rietveld, L.C. 2012. Phosphorus limitation in  
850 nitrifying groundwater filters. *Water Res* 46(4), 1061-1069.
- 851 Delmont, T.O. and Eren, A.M. 2016. Identifying contamination with advanced visualization  
852 and analysis practices: metagenomic approaches for eukaryotic genome assemblies. *PeerJ*  
853 4, e1839.
- 854 Druschel, G.K., Emerson, D., Sutka, R., Suchecki, P. and Luther, G.W. 2008. Low-oxygen  
855 and chemical kinetic constraints on the geochemical niche of neutrophilic iron(II) oxidizing  
856 microorganisms. *Geochim Cosmochim Acta* 72(14), 3358-3370.
- 857 EC 2016 Synthesis Report on the Quality of Drinking Water in the Union examining Member  
858 States' reports for the 2011-2013 period, foreseen under Article 13(5) of Directive  
859 98/83/EC. 2016, [https://ec.europa.eu/environment/water/water-drink/reporting\\_en.html](https://ec.europa.eu/environment/water/water-drink/reporting_en.html).
- 860 Eddy, S.R. 2011. Accelerated Profile HMM Searches. *PLoS Comput Biol* 7(e1002195).
- 861 Emerson, D. and De Vet, W. 2015. The Role of FeOB in Engineered Water Ecosystems: A  
862 Review. *J Am Water Works Assn* 107(1), E47-E57.
- 863 Eren, A.M., Esen, O.C., Quince, C., Vineis, J.H., Morrison, H.G., Sogin, M.L. and Delmont,  
864 T.O. 2015. Anvi'o: an advanced analysis and visualization platform for 'omics data. *PeerJ*  
865 3, e1319.
- 866 Fish, J.A., Chai, B.L., Wang, Q., Sun, Y.N., Brown, C.T., Tiedje, J.M. and Cole, J.R. 2013.  
867 *FunGene: the functional gene pipeline and repository.* *Front Microbiol* 4, 291.
- 868 Flynn, J.D., Hirayama, H., Sakai, Y., Dunfield, P.F., Klotz, M.G., Knief, C., Op den Camp,  
869 H.J.M., Jetten, M.S.M., Khmelenina, V.N., Trotsenko, Y.A., Murrell, J.C., Semrau, J.D.,  
870 Svenning, M.M., Stein, L.Y., Kyrpides, N., Shapiro, N., Woyke, T., Bringel, F.,  
871 Vuilleumier, S., DiSpirito, A.A. and Kalyuzhnaya, M.G. 2016. Draft Genome Sequences



872 of Gammaproteobacterial Methanotrophs Isolated from Marine Ecosystems. *Genome*  
873 *Announc* 4(1), 2.

874 Fowler, S.J., Palomo, A., Dechesne, A., Mines, P.D. and Smets, B.F. 2018. *Comammox*  
875 *Nitrospira* are abundant ammonia oxidizers in diverse groundwater-fed rapid sand filter  
876 communities. *Environ Microbiol* 20(3), 1002-1015.

877 Griebler, C. and Lueders, T. 2009. Microbial biodiversity in groundwater ecosystems. *Freshw*  
878 *Biol* 54(4), 649-677.

879 Gülay, A., Fowler, J., Tatari, K., Thamdrup, B., Albrechtsen, H.-J., Al-Soud, W.A., Sørensen,  
880 S.J. and Smets, B.F. 2019. DNA and RNA-SIP reveal *Nitrospira* spp. as key drivers of  
881 nitrification in groundwater-fed biofilters. *mBio*, 10: e01870-01819.

882 Gülay, A.M., S., Albrechtsen, H.J., Abu Al-Soud, W., Sorensen, S.J. and Smets, B.F. 2016.  
883 Ecological patterns, diversity and core taxa of microbial communities in groundwater-fed  
884 rapid gravity filters. *ISME J.* 10(9), 2209-2222.

885 Hartmann, M., Frey, B., Mayer, J., Mader, P. and Widmer, F. 2015. Distinct soil microbial  
886 diversity under long-term organic and conventional farming. *ISME J* 9(5), 1177-1194.

887 Herrmann, M., Wegner, C.E., Taubert, M., Geesink, P., Lehmann, K., Yan, L.J., Lehmann, R.,  
888 Totsche, K.U. and Kusel, K. 2019. Predominance of *Cand. Patescibacteria* in Groundwater  
889 Is Caused by Their Preferential Mobilization From Soils and Flourishing Under  
890 Oligotrophic Conditions. *Front Microbiol* 10, 1407.

891 Hoefman, S., Heylen, K. and De Vos, P. 2014. *Methylomonas lenta* sp nov., a methanotroph  
892 isolated from manure and a denitrification tank. *Int J Syst Evol Microbiol* 64, 1210-1217.

893 Hug, L.A., Baker, B.J., Anantharaman, K., Brown, C.T., Probst, A.J., Castelle, C.J.,  
894 Butterfield, C.N., Hermsdorf, A.W., Amano, Y., Ise, K., Suzuki, Y., Dudek, N., Relman,  
895 D.A., Finstad, K.M., Amundson, R., Thomas, B.C. and Banfield, J.F. 2016. A new view  
896 of the tree of life. *Nat Microbiol* 1: 16048(5).

897 Hyatt, D. 2010. Prodigal: prokaryotic gene recognition and translation initiation site  
898 identification. *BMC Bioinf* 11(1), 119.

899 Jasniewski, A.J. and Que, L. 2018. Dioxygen Activation by Nonheme Diiron Enzymes:  
900 Diverse Dioxygen Adducts, High-Valent Intermediates, and Related Model Complexes.  
901 *Chem Rev* 118(5), 2554-2592.

- 902 Jones, R.T., Robeson, M.S., Lauber, C.L., Hamady, M., Knight, R. and Fierer, N. 2009. A  
903 comprehensive survey of soil acidobacterial diversity using pyrosequencing and clone  
904 library analyses. *ISME J* 3(4), 442-453.
- 905 Kalyuzhnaya, M.G., Lamb, A.E., McTaggart, T.L., Oshkin, I.Y., Shapiro, N., Woyke, T. and  
906 Chistoserdova, L. 2015. Draft Genome Sequences of Gammaproteobacterial  
907 Methanotrophs Isolated from Lake Washington Sediment. *Genome Announc* 3(2: e00103-  
908 15).
- 909 Khadka, R., Clothier, L., Wang, L., Lim, C.K., Klotz, M.G. and Dunfield, P.F. 2018.  
910 Evolutionary History of Copper Membrane Monooxygenases. *Front Microbiol* 9, 2493.
- 911 Kim, D., Song, L., Breitwieser, F.P. and Salzberg, S.L. 2016. Centrifuge: rapid and sensitive  
912 classification of metagenomic sequences. *Genome Res* 26(12), 1721-1729.
- 913 Kits, K.D., Campbell, D.J., Rosana, A.R. and Stein, L.Y. 2015a. Diverse electron sources  
914 support denitrification under hypoxia in the obligate methanotroph *Methylobacterium*  
915 *album* strain BG8. *Front Microbiol* 6, 1072.
- 916 Kits, K.D., Kalyuzhnaya, M.G., Klotz, M.G., Jetten, M.S., Op den Camp, H.J., Vuilleumier,  
917 S., Bringel, F., Dispirito, A.A., Murrell, J.C., Bruce, D., Cheng, J.F., Copeland, A.,  
918 Goodwin, L., Hauser, L., Lajus, A., Land, M.L., Lapidus, A., Lucas, S., Medigue, C.,  
919 Pitluck, S., Woyke, T., Zeytun, A. and Stein, L.Y. 2013. Genome Sequence of the Obligate  
920 Gammaproteobacterial Methanotroph *Methylobacterium album* Strain BG8. *Genome*  
921 *Announc* 1(2), e0017013.
- 922 Kits, K.D., Klotz, M.G. and Stein, L.Y. 2015b. Methane oxidation coupled to nitrate reduction  
923 under hypoxia by the Gammaproteobacterium *Methylobacterium denitrificans*, sp nov type  
924 strain FJG1. *Environmental Microbiology* 17(9), 3219-3232.
- 925 Kits, K.D., Sedlacek, C.J., Lebedeva, E.V., Han, P., Bulaev, A., Pjevac, P., Daebeler, A.,  
926 Romano, S., Albertsen, M., Stein, L.Y., Daims, H. and Wagner, M. 2017. Kinetic analysis  
927 of a complete nitrifier reveals an oligotrophic lifestyle. *Nature* 549(7671), 269-272.
- 928 Kitzinger, K., Koch, H., Lucker, S., Sedlacek, C.J., Herbold, C., Schwarz, J., Daebeler, A.,  
929 Mueller, A.J., Lukumbuzya, M., Romano, S., Leisch, N., Karst, S.M., Kirkegaard, R.,  
930 Albertsen, M., Nielsen, P.H., Wagner, M. and Daims, H. 2018. Characterization of the  
931 First "Candidatus Nitrotoga" Isolate Reveals Metabolic Versatility and Separate Evolution  
932 of Widespread Nitrite-Oxidizing Bacteria. *mBio* 9(4:e01186-18).

- 933 Koch, T. and Dahl, C. 2018. A novel bacterial sulfur oxidation pathway provides a new link  
934 between the cycles of organic and inorganic sulfur compounds. *ISME J* 12(10), 2479-2491.
- 935 Koren, S., Walenz, B.P., Berlin, K., Miller, J.R., Bergman, N.H. and Phillippy, A.M. 2017.  
936 Canu: scalable and accurate long-read assembly via adaptive k-mer weighting and repeat  
937 separation. *Genome Res* 27(5), 722-736.
- 938 Koster, J. and Rahmann, S. 2012. Snakemake-a scalable bioinformatics workflow engine.  
939 *Bioinformatics* 28(19), 2520-2522.
- 940 Kowalchuk, G.A., de Bruijn, F.J., Head, I.M., Akkermans, A.D. and van Elsas, J.D. 2004  
941 Molecular microbial ecology manual (MMEM), 2nd ed., vol. 1.,  
942 Kluwer Academic Publishing, London, United Kingdom.
- 943 Krogh, A., Larsson, B., von Heijne, G. and Sonnhammer, E.L.L. 2001. Predicting  
944 transmembrane protein topology with a hidden Markov model: Application to complete  
945 genomes. *J Mol Biol* 305(3), 567-580.
- 946 Langmead, B. and Salzberg, S.L. 2012. Fast gapped-read alignment with Bowtie 2. *Nat*  
947 *Methods* 9(4), 357-359.
- 948 Li, D.H., Liu, C.M., Luo, R.B., Sadakane, K. and Lam, T.W. 2015. MEGAHIT: an ultra-fast  
949 single-node solution for large and complex metagenomics assembly via succinct de Bruijn  
950 graph. *Bioinformatics* 31(10), 1674-1676.
- 951 Li, H. 2018. Minimap2: pairwise alignment for nucleotide sequences. *Bioinformatics* 34(18),  
952 3094-3100.
- 953 Li, H. and Durbin, R. 2010. Fast and accurate long-read alignment with Burrows-Wheeler  
954 transform. *Bioinformatics* 26(5), 589-595.
- 955 Li, H., Handsaker, B., Wysoker, A., Fennell, T., Ruan, J., Homer, N., Marth, G., Abecasis, G.,  
956 Durbin, R. and Genome Project Data, P. 2009. The Sequence Alignment/Map format and  
957 SAMtools. *Bioinformatics* 25(16), 2078-2079.
- 958 Li, H.S. and Carlson, K.H. 2014. Distribution and Origin of Groundwater Methane in the  
959 Wattenberg Oil and Gas Field of Northern Colorado. *Environ Sci Technol* 48(3), 1484-  
960 1491.
- 961 Li, Q., Yu, S.L., Li, L., Liu, G.C., Gu, Z.Y., Liu, M.M., Liu, Z.Y., Ye, Y.B., Xia, Q. and Ren,  
962 L.M. 2017. Microbial Communities Shaped by Treatment Processes in a Drinking Water

963 Treatment Plant and Their Contribution and Threat to Drinking Water Safety. *Front*  
964 *Microbiol* 8, 2465.

965 Ludwig, W., Strunk, O., Westram, R., Richter, L., Meier, H., Yadhukumar, Buchner, A., Lai,  
966 T., Steppi, S., Jobb, G., Forster, W., Brettske, I., Gerber, S., Ginhart, A.W., Gross, O.,  
967 Grumann, S., Hermann, S., Jost, R., Konig, A., Liss, T., Lussmann, R., May, M., Nonhoff,  
968 B., Reichel, B., Strehlow, R., Stamatakis, A., Stuckmann, N., Vilbig, A., Lenke, M.,  
969 Ludwig, T., Bode, A. and Schleifer, K.H. 2004. ARB: a software environment for  
970 sequence data. *Nucleic Acids Res* 32(4), 1363-1371.

971 Lückner, S., Nowka, B., Rattei, T., Spieck, E. and Daims, H. 2013. The Genome of *Nitrospina*  
972 *gracilis* Illuminates the Metabolism and Evolution of the Major Marine Nitrite Oxidizer.  
973 *Front Microbiol* 4, 27.

974 Maksimavičius, E. and Roslev, P. 2020. Methane emission and methanotrophic activity in  
975 groundwater fed drinking water treatment plants. *Water Supply*, ws2020009.

976 Marcia, M., Ermler, U., Peng, G.H. and Michel, H. 2009. The structure of *Aquifex aeolicus*  
977 sulfide:quinone oxidoreductase, a basis to understand sulfide detoxification and respiration.  
978 *Proc. Natl. Acad. Sci. U.S.A.* 106(24), 9625-9630.

979 Martens-Habbena, W., Berube, P.M., Urakawa, H., de la Torre, J.R. and Stahl, D.A. 2009.  
980 Ammonia oxidation kinetics determine niche separation of nitrifying Archaea and Bacteria.  
981 *Nature* 461(7266), 976-979.

982 Matsen, F.A., Kodner, R.B. and Armbrust, E.V. 2010. pplacer: linear time maximum-  
983 likelihood and Bayesian phylogenetic placement of sequences onto a fixed reference tree.  
984 *Bmc Bioinf* 11(538).

985 Miller, M.A., Pfeiffer, W. and Schwartz, T. 2010 Creating the CIPRES Science Gateway for  
986 inference of large phylogenetic trees. *Gateway Computing Environments Workshop*  
987 (GCE), pp. 1-8.

988 Na, S.I., Kim, Y.O., Yoon, S.H., Ha, S.M., Baek, I. and Chun, J. 2018. UBCG: Up-to-date  
989 bacterial core gene set and pipeline for phylogenomic tree reconstruction. *J Microbiol*  
990 56(4), 280-285.

991 Navarrete, A.A., Venturini, A.M., Meyer, K.M., Klein, A.M., Tiedje, J.M., Bohannon, B.J.M.,  
992 Nusslein, K., Tsai, S.M. and Rodrigues, J.L.M. 2015. Differential Response of

- 993 Acidobacteria Subgroups to Forest-to-Pasture Conversion and Their Biogeographic  
994 Patterns in the Western Brazilian Amazon. *Front Microbiol* 6, 1443.
- 995 Nurk, S., Meleshko, D., Korobeynikov, A. and Pevzner, P.A. 2017. metaSPAdes: a new  
996 versatile metagenomic assembler. *Genome Res* 27(5), 824-834.
- 997 Ogiso, T., Ueno, C., Dianou, D., Huy, T.V., Katayama, A., Kimura, M. and Asakawa, S. 2012.  
998 *Methylomonas koyamae* sp nov., a type I methane-oxidizing bacterium from floodwater of  
999 a rice paddy field. *Int J Syst Evol Microbiol* 62, 1832-1837.
- 1000 Oh, S., Hammes, F. and Liu, W.T. 2018. Metagenomic characterization of biofilter microbial  
1001 communities in a full-scale drinking water treatment plant. *Water Res* 128, 278-285.
- 1002 Okabe, S., Kindaichi, T. and Ito, T. 2005. Fate of <sup>14</sup>C-Labeled Microbial Products Derived  
1003 from Nitrifying Bacteria in Autotrophic Nitrifying Biofilms. *Appl Environ Microbiol*  
1004 71(7), 3987.
- 1005 Okoniewska, E., Lach, J., Kacprzak, M. and Neczaj, E. 2007. The removal of manganese,  
1006 iron and ammonium nitrogen on impregnated activated carbon. *Desalination* 206(1-3), 251-  
1007 258.
- 1008 Olm, M.R., Brown, C.T., Brooks, B. and Banfield, J.F. 2017. dRep: a tool for fast and accurate  
1009 genomic comparisons that enables improved genome recovery from metagenomes through  
1010 de-replication. *ISME J* 11(12), 2864-2868.
- 1011 Osborn, S.G., Vengosh, A., Warner, N.R. and Jackson, R.B. 2011. Methane contamination of  
1012 drinking water accompanying gas-well drilling and hydraulic fracturing. *Proc. Natl. Acad.*  
1013 *Sci. U.S.A.* 108(20), 8172-8176.
- 1014 Oswald, K., Graf, J.S., Littmann, S., Tienken, D., Brand, A., Wehrli, B., Albertsen, M., Daims,  
1015 H., Wagner, M., Kuypers, M.M.M., Schubert, C.J. and Milucka, J. 2017. *Crenothrix* are  
1016 major methane consumers in stratified lakes. *ISME J.* 11(9), 2124-2140.
- 1017 Palomo, A., Dechesne, A. and Smets, B.F. 2019. Genomic profiling of *Nitrospira* species  
1018 reveals ecological success of comammox *Nitrospira*. *bioRxiv*, 612226.
- 1019 Palomo, A., Jane Fowler, S., Gulay, A., Rasmussen, S., Sicheritz-Ponten, T. and Smets, B.F.  
1020 2016. Metagenomic analysis of rapid gravity sand filter microbial communities suggests  
1021 novel physiology of *Nitrospira* spp. *ISME J* 10(11), 2569-2581.

- 1022 Palomo, A., Pedersen, A.G., Fowler, S.J., Dechesne, A., Sicheritz-Ponten, T. and Smets, B.F.  
1023 2018. Comparative genomics sheds light on niche differentiation and the evolutionary  
1024 history of comammox Nitrospira. *ISME J.* 12(7), 1779-1793.
- 1025 Parks, D.H., Chuvochina, M., Waite, D.W., Rinke, C., Skarszewski, A., Chaumeil, P.A. and  
1026 Hugenholtz, P. 2018. A standardized bacterial taxonomy based on genome phylogeny  
1027 substantially revises the tree of life. *Nature Biotechnology* 36(10), 996-1004.
- 1028 Parks, D.H., Imelfort, M., Skennerton, C.T., Hugenholtz, P. and Tyson, G.W. 2015. CheckM:  
1029 assessing the quality of microbial genomes recovered from isolates, single cells, and  
1030 metagenomes. *Genome research* 25(7), 1043-1055.
- 1031 Parks, D.H., Rinke, C., Chuvochina, M., Chaumeil, P.A., Woodcroft, B., Evans, P.N.,  
1032 Hugenholtz, P. and Tyson, G.W. 2017. Recovery of nearly 8,000 metagenome-assembled  
1033 genomes substantially expands the tree of life. *Nat Microbiol* 3(2), 253-253.
- 1034 Pinto, A.J., Marcus, D.N., Ijaz, U.Z., Santos, Q., Dick, G.J. and Raskin, L. 2015. Metagenomic  
1035 Evidence for the Presence of Comammox Nitrospira-Like Bacteria in a Drinking Water  
1036 System. *Msphere* 1(1), e00054-00015.
- 1037 Pinto, A.J., Xi, C.W. and Raskin, L. 2012. Bacterial Community Structure in the Drinking  
1038 Water Microbiome Is Governed by Filtration Processes. *Environ Sci Technol* 46(16), 8851-  
1039 8859.
- 1040 Poghosyan, L., Koch, H., Lavy, A., Frank, J., van Kessel, M.A.H.J., Jetten, M.S.M., Banfield,  
1041 J.F. and Lucker, S. 2019. Metagenomic recovery of two distinct comammox Nitrospira  
1042 from the terrestrial subsurface. *Environ Microbiol* 21(10), 3627-3637.
- 1043 Pol, A., Barends, T.R.M., Dietl, A., Khadem, A.F., Eygensteyn, J., Jetten, M.S.M. and Op den  
1044 Camp, H.J.M. 2014. Rare earth metals are essential for methanotrophic life in volcanic  
1045 mudpots. *Environ Microbiol* 16(1), 255-264.
- 1046 Proctor, C.R. and Hammes, F. 2015. Drinking water microbiology - from measurement to  
1047 management. *Curr Opin Biotechnol* 33, 87-94.
- 1048 Prosser, J.I. and Nicol, G.W. 2012. Archaeal and bacterial ammonia-oxidisers in soil: the  
1049 quest for niche specialisation and differentiation. *Trends Microbiol* 20(11), 523-531.
- 1050 Quatrini, R., Appia-Ayme, C., Denis, Y., Jedlicki, E., Holmes, D.S. and Bonnefoy, V. 2009.  
1051 Extending the models for iron and sulfur oxidation in the extreme Acidophile  
1052 *Acidithiobacillus ferrooxidans*. *Bmc Genomics* 10(394).

- 1053 Racine, J.S. 2012. RStudio: A Platform-Independent IDE for R and Sweave. *J Appl Econ*  
1054 27(1), 167-172.
- 1055 Rinke, C., Schwientek, P., Sczyrba, A., Ivanova, N.N., Anderson, I.J., Cheng, J.F., Darling, A.,  
1056 Malfatti, S., Swan, B.K., Gies, E.A., Dodsworth, J.A., Hedlund, B.P., Tsiamis, G., Sievert,  
1057 S.M., Liu, W.T., Eisen, J.A., Hallam, S.J., Kyrpides, N.C., Stepanauskas, R., Rubin, E.M.,  
1058 Hugenholtz, P. and Woyke, T. 2013. Insights into the phylogeny and coding potential of  
1059 microbial dark matter. *Nature* 499(7459), 431-437.
- 1060 Rittmann, B.E., Tangy, Y., Meyer, K. and Bellamy, W.D. 2012 Biological processes, chapter  
1061 17. In: *Water treatment design*. Ed Randtke SJ and Horsley  
1062 MB, Am Water Works Assoc (AWWA), McGraw Hill.
- 1063 Sczyrba, A., Hofmann, P., Belmann, P., Koslicki, D., Janssen, S., Dröge, J., Gregor, I., Majda,  
1064 S., Fiedler, J., Dahms, E., Bremges, A., Fritz, A., Garrido-Oter, R., Jørgensen, T.S.,  
1065 Shapiro, N., Blood, P.D., Gurevich, A., Bai, Y., Turaev, D., DeMaere, M.Z., Chikhi, R.,  
1066 Nagarajan, N., Quince, C., Meyer, F., Balvočiūtė, M., Hansen, L.H., Sørensen, S.J., Chia,  
1067 B.K.H., Denis, B., Froula, J.L., Wang, Z., Egan, R., Don Kang, D., Cook, J.J., Deltel, C.,  
1068 Beckstette, M., Lemaitre, C., Peterlongo, P., Rizk, G., Lavenier, D., Wu, Y.-W., Singer,  
1069 S.W., Jain, C., Strous, M., Klingenberg, H., Meinicke, P., Barton, M.D., Lingner, T., Lin,  
1070 H.-H., Liao, Y.-C., Silva, G.G.Z., Cuevas, D.A., Edwards, R.A., Saha, S., Piro, V.C.,  
1071 Renard, B.Y., Pop, M., Klenk, H.-P., Göker, M., Kyrpides, N.C., Woyke, T., Vorholt, J.A.,  
1072 Schulze-Lefert, P., Rubin, E.M., Darling, A.E., Rattei, T. and McHardy, A.C. 2017.  
1073 Critical Assessment of Metagenome Interpretation—a benchmark of metagenomics  
1074 software. *Nat Methods* 14(11), 1063-1071.
- 1075 Seemann, T. 2014. Prokka: rapid prokaryotic genome annotation. *Bioinformatics* 30(14),  
1076 2068-2069.
- 1077 Sercu, B., Nunez, D., Van Langenhove, H., Aroca, G. and Verstraete, W. 2005. Operational  
1078 and microbiological aspects of a bioaugmented two-stage biotrickling filter removing  
1079 hydrogen sulfide and dimethyl sulfide. *Biotechnol Bioeng* 90(2), 259-269.
- 1080 Shahak, Y. and Hauska, G. (2008) *Sulfur Metabolism in Phototrophic Organisms*. Hell, R.,  
1081 Dahl, C., Knaff, D. and Leustek, T. (eds), pp. 319-335, Springer Netherlands, Dordrecht.
- 1082 Sharma, S.K., Petrusevski, B. and Schippers, J.C. 2005. Biological iron removal from  
1083 groundwater: a review. *J. Water Supply Res. Technol. AQUA* 54(4), 239-247.

- 1084 Shi, X.Z., Hu, H.W., Wang, J.Q., He, J.Z., Zheng, C.Y., Wan, X.H. and Huang, Z.Q. 2018.  
1085 Niche separation of comammox *Nitrospira* and canonical ammonia oxidizers in an acidic  
1086 subtropical forest soil under long-term nitrogen deposition. *Soil Biol Biochem* 126, 114-  
1087 122.
- 1088 Stamatakis, A. 2014. RAxML version 8: a tool for phylogenetic analysis and post-analysis of  
1089 large phylogenies. *Bioinformatics* 30(9), 1312-1313.
- 1090 Stocker, T.F., Qin, D., Plattner, G.K., Tignor, M., Allen, S.K., Boschung, J., Nauels, A.,  
1091 Midgley, P.M., Bex, V. and Xia, Y. 2013 IPCC, 2013: Climate Change 2013: The Physical  
1092 Science Basis. Working Group I Contribution to the IPCC 5th Assessment Report, IPCC,  
1093 Cambridge University Press, Cambridge, United Kingdom and New York, NY, USA, 1535  
1094 pp.
- 1095 Streese, J. and Stegmann, R. 2003. Microbial oxidation of methane from old landfills in  
1096 biofilters. *Waste Manage* 23(7), 573-580.
- 1097 Svenning, M.M., Hestnes, A.G., Wartiainen, I., Stein, L.Y., Klotz, M.G., Kalyuzhnaya, M.G.,  
1098 Spang, A., Bringel, F., Vuilleumier, S., Lajus, A., Medigue, C., Bruce, D.C., Cheng, J.F.,  
1099 Goodwin, L., Ivanova, N., Han, J., Han, C.S., Hauser, L., Held, B., Land, M.L., Lapidus,  
1100 A., Lucas, S., Nolan, M., Pitluck, S. and Woyke, T. 2011. Genome Sequence of the Arctic  
1101 Methanotroph *Methylobacter tundripaludum* SV96. *J Bacteriol* 193(22), 6418-6419.
- 1102 Tatari, K., Musovic, S., Gulay, A., Dechesne, A., Albrechtsen, H.J. and Smets, B.F. 2017.  
1103 Density and distribution of nitrifying guilds in rapid sand filters for drinking water  
1104 production: Dominance of *Nitrospira* spp. *Water Res* 127, 239-248.
- 1105 Tatusov, R.L., Koonin, E.V. and Lipman, D.J. 1997. A genomic perspective on protein  
1106 families. *Science* 278(5338), 631-637.
- 1107 Tavormina, P.L., Orphan, V.J., Kalyuzhnaya, M.G., Jetten, M.S.M. and Klotz, M.G. 2011. A  
1108 novel family of functional operons encoding methane/ammonia monooxygenase-related  
1109 proteins in gammaproteobacterial methanotrophs. *Environ Microbiol Rep* 3(1), 91-100.
- 1110 Tekerlekopoulou, A.G., Vasiliadou, I.A. and Vayenas, D.V. 2006. Physico-chemical and  
1111 biological iron removal from potable water. *Biochem Eng J* 31(1), 74-83.
- 1112 Trifinopoulos, J., Nguyen, L.T., von Haeseler, A. and Minh, B.Q. 2016. W-IQ-TREE: a fast  
1113 online phylogenetic tool for maximum likelihood analysis. *Nucleic Acids Res* 44(W1),  
1114 W232-W235.



- 1115 Trussell, R.R., Hand, D.W., Tchobanoglous, G., Howe, K.J. and Crittenden, J.C. (2012)  
1116 Principles of Water Treatment, John Wiley & Sons Inc, Hoboken, New Jersey.
- 1117 van der Wielen, P.W.J.J., Voost, S. and van der Kooij, D. 2009. Ammonia-Oxidizing Bacteria  
1118 and Archaea in Groundwater Treatment and Drinking Water Distribution Systems. *Appl*  
1119 *Environ Microbiol* 75(14), 4687-4695.
- 1120 Vaser, R., Sovic, I., Nagarajan, N. and Sikic, M. 2017. Fast and accurate de novo genome  
1121 assembly from long uncorrected reads. *Genome Res* 27(5), 737-746.
- 1122 Vekeman, B., Kerckhof, F.M., Cremers, G., de Vos, P., Vandamme, P., Boon, N., Op den  
1123 Camp, H.J.M. and Heylen, K. 2016. New Methyloceanibacter diversity from North Sea  
1124 sediments includes methanotroph containing solely the soluble methane monooxygenase.  
1125 *Environ Microbiol* 18(12), 4523-4536.
- 1126 Wagner, F.B., Nielsen, P.B., Boe-Hansen, R. and Albrechtsen, H.J. 2016. Copper deficiency  
1127 can limit nitrification in biological rapid sand filters for drinking water production. *Water*  
1128 *Res* 95, 280-288.
- 1129 Wallar, B.J. and Lipscomb, J.D. 1996. Dioxygen activation by enzymes containing binuclear  
1130 non-heme iron clusters. *Chem Rev* 96(7), 2625-2657.
- 1131 Wang, Y., Ma, L., Mao, Y., Jiang, X., Xia, Y., Yu, K., Li, B. and Zhang, T. 2017. Comammox  
1132 in drinking water systems. *Water Res* 116, 332-341.
- 1133 Wang, Z.H., Cao, Y.Q., Zhu-Barker, X., Nicol, G.W., Wright, A.L., Jia, Z.J. and Jiang, X.J.  
1134 2019. Comammox Nitrospira clade B contributes to nitrification in soil. *Soil Biol Biochem*  
1135 135, 392-395.
- 1136 Ward, N.L., Challacombe, J.F., Janssen, P.H., Henrissat, B., Coutinho, P.M., Wu, M., Xie, G.,  
1137 Haft, D.H., Sait, M., Badger, J., Barabote, R.D., Bradley, B., Brettin, T.S., Brinkac, L.M.,  
1138 Bruce, D., Creasy, T., Daugherty, S.C., Davidsen, T.M., Deboy, R.T., Detter, J.C., Dodson,  
1139 R.J., Durkin, A.S., Ganapathy, A., Gwinn-Giglio, M., Han, C.S., Khouri, H., Kiss, H.,  
1140 Kothari, S.P., Madupu, R., Nelson, K.E., Nelson, W.C., Paulsen, I., Penn, K., Ren, Q.H.,  
1141 Rosovitz, M.J., Selengut, J.D., Shrivastava, S., Sullivan, S.A., Tapia, R., Thompson, L.S.,  
1142 Watkins, K.L., Yang, Q., Yu, C.H., Zafar, N., Zhou, L.W. and Kuske, C.R. 2009. Three  
1143 Genomes from the Phylum Acidobacteria Provide Insight into the Lifestyles of These  
1144 Microorganisms in Soils. *Appl Environ Microbiol* 75(7), 2046-2056.

- 1145 Watanabe, T., Kojima, H., Umezawa, K., Hori, C., Takasuka, T.E., Kato, Y. and Fukui, M.  
1146 2019. Genomes of Neutrophilic Sulfur-Oxidizing Chemolithoautotrophs Representing 9  
1147 Proteobacterial Species From 8 Genera. *Front Microbiol* 10(316).
- 1148 Wegner, C.E., Gaspar, M., Geesink, P., Herrmann, M., Marz, M. and Kusel, K. 2019.  
1149 Biogeochemical Regimes in Shallow Aquifers Reflect the Metabolic Coupling of the  
1150 Elements Nitrogen, Sulfur, and Carbon. *Appl Environ Microbiol* 85(9), 0099-2240.
- 1151 Whitman, W.B., Oren, A., Chuvochina, M., da Costa, M.S., Garrity, G.M., Rainey, F.A.,  
1152 Rossello-Mora, R., Schink, B., Sutcliffe, I., Trujillo, M.E. and Ventura, S. 2018. Proposal  
1153 of the suffix -ota to denote phyla. Addendum to 'Proposal to include the rank of phylum in  
1154 the International Code of Nomenclature of Prokaryotes'. *Int. J. Syst. Evol. Microbiol.* 68(3),  
1155 967-969.
- 1156 Wickham, H. 2016 *ggplot2: Elegant Graphics for Data Analysis*, (Springer, Heidelberg),  
1157 Springer, Heidelberg.
- 1158 Wilczak, A., Jacangelo, J.G., Marcinko, J.P., Odell, L.H., Kirmeyer, G.J. and Wolfe, R.L.  
1159 1996. Occurrence of nitrification in chloraminated distribution systems. *J Am Water*  
1160 *Works Assoc* 88(7), 74-85.
- 1161 Yan, L., Herrmann, M., Kampe, B., Lehmann, R., Totsche, K.U. and Küsel, K. 2020.  
1162 Environmental selection shapes the formation of near-surface groundwater microbiomes.  
1163 *Water Res* 170, 115341.
- 1164 Yang, J.X., Ma, J., Song, D., Zhai, X.D. and Kong, X.J. 2016. Impact of preozonation on the  
1165 bioactivity and biodiversity of subsequent biofilters under low temperature conditions-A  
1166 pilot study. *Front Environ Sci Eng* 10(4).
- 1167 Zhang, Y.F., Yang, Y., Liu, J.S. and Qiu, G.Z. 2013. Isolation and characterization of  
1168 *Acidithiobacillus ferrooxidans* strain QXS-1 capable of unusual ferrous iron and sulfur  
1169 utilization. *Hydrometallurgy* 136, 51-57.
- 1170 Zhou, J.Z., Bruns, M.A. and Tiedje, J.M. 1996. DNA recovery from soils of diverse  
1171 composition. *Appl Environ Microbiol* 62(2), 316-322.
- 1172
